1 **GWAS analysis combined with QTL mapping identify *CPT3* and *ABH* as genes**  
2 **underlying dolichol accumulation in Arabidopsis**

3

4 Katarzyna Gawarecka<sup>1,3</sup>, Joanna Siwinska<sup>2</sup>, Jaroslaw Poznanski<sup>1</sup>, Agnieszka Onysk<sup>1</sup>,  
5 Przemyslaw Surowiecki<sup>1</sup>, Liliana Surmacz<sup>1</sup>, Ji Hoon Ahn<sup>3</sup>, Arthur Korte<sup>4</sup>, Ewa Swiezewska<sup>1\*</sup>,  
6 Anna Ihnatowicz<sup>2\*</sup>

7

8 <sup>1</sup>Institute of Biochemistry and Biophysics Polish Academy of Sciences, Pawinskiego 5a, 02-  
9 106 Warszawa, Poland; <sup>2</sup>Intercollegiate Faculty of Biotechnology of University of Gdansk and  
10 Medical University of Gdansk, Abrahama 58, 80-307 Gdansk, Poland; <sup>3</sup>Department of Life  
11 Sciences, Korea University, Seoul, Korea, <sup>4</sup>Center for Computational and Theoretical Biology,  
12 University of Wurzburg, Emil-Fischer Strasse 32, 97074 Wurzburg, Germany

13

14 **\*Correspondence:**

15 **Anna Ihnatowicz**

16 Intercollegiate Faculty of Biotechnology of University of Gdansk and Medical University of  
17 Gdansk, E-mail: [anna.ihnatowicz@biotech.ug.edu.pl](mailto:anna.ihnatowicz@biotech.ug.edu.pl);

18

19 **Ewa Swiezewska**

20 Institute of Biochemistry and Biophysics Polish Academy of Sciences; E-mail:  
21 [ewas@ibb.waw.pl](mailto:ewas@ibb.waw.pl)

22

23 **Short running title:** Genetics of dolichol accumulation

24

25

26 **ABSTRACT**

27 Dolichols (Dols), ubiquitous components of living organisms, are indispensable for cell  
28 survival. In plants, as well as other eukaryotes, Dols are crucial for posttranslational protein  
29 glycosylation, aberration of which leads to fatal metabolic disorders in humans. Until now, the  
30 regulatory mechanisms underlying Dol accumulation remain elusive. In this report, we have  
31 analyzed the natural variation of the accumulation of Dols and six other isoprenoids between  
32 120 *Arabidopsis thaliana* accessions. Subsequently, by combining QTL and GWAS approaches,  
33 we have identified several candidate genes involved in the accumulation of Dols, polyprenols,  
34 plastoquinone, and phytosterols. The role of two genes implicated in the accumulation of major  
35 Dols in *Arabidopsis* – the AT2G17570 gene encoding a long searched for *cis*-prenyltransferase  
36 (CPT3) and the AT1G52460 gene encoding an alpha-beta hydrolase (ABH) – is experimentally  
37 confirmed. These data will help to generate Dol-enriched plants which might serve as a remedy  
38 for Dol-deficiency in humans.

39

40 *Keyword index:* isoprenoid, polyprenol, dolichol, natural variation, plant-environment  
41 interactions, secondary metabolism, QTL mapping, GWAS

42

43

44

45

46

47

48

49

50

## 51 INTRODUCTION

52 Isoprenoids (also known as terpenes) are a large and diverse group of compounds comprised of  
53 more than 40,000 chemical structures (Bohlmann and Keeling, 2008). Linear polymers  
54 containing from 5 to more than 100 isoprene units are called polyisoprenoids (Swiezewska and  
55 Danikiewicz, 2005). Due to the hydrogenation status of their OH-terminal, ( $\alpha$ -) isoprene unit,  
56 polyisoprenoids are subdivided into  $\alpha$ -unsaturated polyprenols (hereafter named Prens) and  $\alpha$ -  
57 saturated dolichols (hereafter named Dols) (Figure 1). Prens are common for bacteria, green  
58 parts of plants, wood, seeds, and flowers, while Dols are constituents of plant roots as well as  
59 animal and fungal cells (Rezanka and Votruba, 2001). In eukaryotic cells, the dominating  
60 polyisoprenoid components are accompanied by traces of their counterparts, e.g., Prens are  
61 accompanied by Dols in photosynthetic tissues (Skorupinska-Tudek et al., 2003).

62  
63 All isoprenoids are synthesized from isopentenyl and dimethylallyl diphosphate (IPP and  
64 DMAPP) molecules, which in plants are derived from the cytoplasmic mevalonate (MVA) and  
65 plastidial methylerythritol phosphate (MEP) pathways (Hemmerlin et al., 2012; Lipko and  
66 Swiezewska, 2016). Formation of the polyisoprenoid chains of both Pren and Dol from IPP is  
67 executed by enzymes called *cis*-prenyltransferases (CPTs), which are responsible for elongation  
68 of an all-*trans* initiator molecule, most commonly farnesyl or geranylgeranyl diphosphate. This  
69 reaction generates a mixture of polyprenyl diphosphates (PolyprenylIPP) of similar, CPT-  
70 specific, lengths. In *Arabidopsis thaliana* (hereafter named Arabidopsis), only three (Oh et al.,  
71 2000; Cunillera et al., 2000; Surowiecki et al., 2019; Kera et al., 2012; Surmacz et al., 2014;  
72 Akhtar et al., 2017) out of nine putative CPTs (Surmacz and Swiezewska, 2011) have been  
73 characterized at the molecular level. Interestingly, none of these well-characterized CPTs  
74 (CPT1, -6 or -7) is responsible for the synthesis of the major ‘family’ of Dols (Dol-16  
75 dominating) accumulated in Arabidopsis tissues.

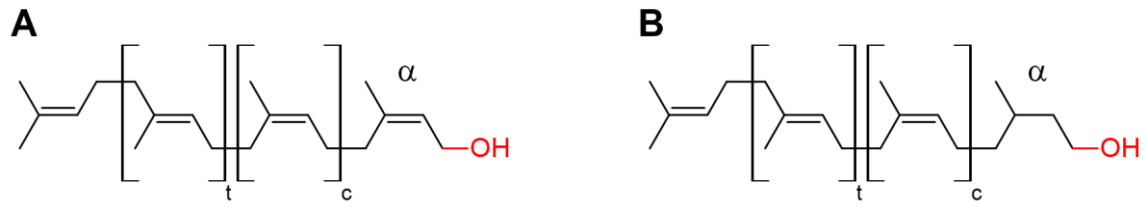

76

77 **Figure 1**

78 **Structures of polyprenol (A) and dolichol (B).** t and c stand for the number of internal

79 isoprene units in *trans* and *cis* configuration, respectively. The  $\alpha$ -terminal isoprene unit is

80 depicted.

81 The polyprenyl diphosphates resulting from CPT activity undergo then either  
82 dephosphorylation to Prens and/or reduction to Dols. The reduction reaction is catalyzed by  
83 polyprenol reductases, two of which have been recently described in Arabidopsis (Jozwiak et  
84 al., 2015). Although most enzymes functioning in the Pren and Dol biosynthesis pathways have  
85 been identified, the potential regulatory mechanisms remain unknown.

86

87 Isoprenoids are implicated in vital processes in plants, e.g. in photosynthesis and stress response  
88 (chlorophylls, carotenoids, plastoquinone, and tocopherols), or in the synthesis of plant  
89 hormones (carotenoids, sterols), or they function as structural components of membranes  
90 (sterols) (Tholl, 2015). Polyisoprenoids are modulators of the physico-chemical properties of  
91 membranes, but they are also involved in other specific processes. Dolichyl phosphate (DolP)  
92 serves as an obligate cofactor for protein glycosylation and for the formation of  
93 glycosylphosphatidylinositol (GPI) anchors, while Prens, in turn, have been shown to play a  
94 role in plant photosynthetic performance (Akhtar et al., 2017). Importantly, an increased content  
95 of Prens improves the environmental fitness of plants (Hallahan and Keiper-Hrynko, 2006).  
96 Additionally, it has also been suggested that in plants Prens and Dols might participate in cell  
97 response to stress since their content is modulated by the availability of nutrients (Jozwiak et  
98 al., 2013) and by other environmental factors (xenobiotics, pathogens, and light intensity)  
99 (summarized in Surmacz and Swiezewska, 2011). Moreover, the cellular concentration of Prens  
100 and Dols is also considerably increased upon senescence (summarized in Swiezewska and  
101 Danikiewicz, 2005). These observations suggest that eukaryotes might possess, so far elusive,  
102 regulatory mechanisms allowing them to control polyisoprenoid synthesis and/or degradation.  
103 Until now, no systematic analysis of the natural variation of polyisoprenoids has been  
104 performed for any plant species.

105

106 Most traits important in agriculture, medicine, ecology, and evolution, including variation in  
107 chemical compound production, are of a quantitative nature and are usually due to multiple  
108 segregating loci (Mackay 2001). *Arabidopsis* is an excellent model for studying natural  
109 variation due to its genetic adaptation to different natural habitats and its extensive variation in  
110 morphology, metabolism, and growth (Alonso-Blanco et al., 2009; Fusari et al., 2017). Natural  
111 variation for many traits has been reported in *Arabidopsis*, including primary and secondary  
112 metabolism (Mitchell-Olds and Pedersen, 1998; Kliebenstein et al., 2001; Sergeeva et al., 2004;  
113 Tholl et al., 2005; Keurentjes et al., 2006; Meyer et al., 2007; Lisec et al., 2008; Rowe et al.,  
114 2008; Siwinska et al., 2015). Therefore, in this study, we decided to use the model plant  
115 *Arabidopsis* to explore the natural variation of Prens and Dols. Importantly, *Arabidopsis*  
116 provides the largest and best-described body of data on the natural variation of genomic features  
117 of any plant species (Kawakatsu et al., 2016; The 1001 Genomes Consortium, 2016). Over  
118 6,000 different *Arabidopsis* accessions that can acclimate to enormously different environments  
119 (Kramer, 2015) have been described so far (Weigel and Mott, 2009).

120  
121 In order to understand the genetic basis underlying the variation in polyisoprenoid content, and  
122 to identify genes that are responsible for it, we used both a quantitative trait loci (QTL) mapping  
123 approach and genome-wide association studies (GWAS). So far, neither QTL nor GWAS has  
124 been used for the analysis of Prens and Dols. Traditional linkage mapping usually results in  
125 detection of several QTLs with a high statistical power, making it a powerful method in the  
126 identification of genomic regions that co-segregate with a given trait in mapping populations  
127 (Koornneef et al., 2004; Korte and Farlow, 2013). But the whole procedure including the  
128 identification of underlying genes is usually time-consuming and laborious. Moreover, the  
129 mapped QTL regions can be quite large, making it sometimes impossible to identify the  
130 causative genes. Another issue is that the full range of natural variation is not analyzed in QTL

131 studies using bi-parental populations, because they are highly dependent on the genetic  
132 diversity of the two parents and may reflect rare alleles. GWAS studies profit from a wide allelic  
133 diversity, high resolution and may lead to the identification of more evolutionarily relevant  
134 variation (Kooke et al., 2016). Therefore, it is possible to overcome some limitations of QTL  
135 analyses by using the GWAS approach, which can be used to narrow down the candidate  
136 regions (Korte and Farlow, 2013; Han et al., 2018). But it should be kept in mind that GWAS  
137 also has its limitations, such as dependence on the population structure or the potential for false-  
138 positive errors (Zhu et al., 2008; Korte and Farlow, 2013). We have applied here both QTL  
139 mapping and GWAS analyses because it has been shown that the combination of these two  
140 methods can alleviate their respective limitations (Zhao et al., 2007; Brachi et al., 2010).

141  
142 The described here application of QTL and GWAS led to identification of several candidate  
143 genes underlying the accumulation of polyisoprenoids. Additionally, to get insight into the  
144 biosynthetic pathways of Dols and Prens in a broader cellular context, a set of seven isoprenoid  
145 compounds was analyzed and subsequently candidate genes that possibly determine the  
146 observed phenotypic variation were selected. The most interesting of the identified genes were  
147 *cis-prenyltransferase 3* (*CPT3*, AT2G17570, identified through QTL) and *alpha-beta*  
148 *hydrolase* (*ABH*, AT1G52460, identified through GWAS). *CPT3*, although biochemically not  
149 characterized, has been suggested to possess a CPT-like activity (Kwon et al., 2016), whereas  
150 alpha-beta hydrolase has not been previously connected with the regulation of polyisoprenoid  
151 biosynthesis. In this work, their involvement in Dol biosynthesis/accumulation is  
152 experimentally confirmed. Importantly, identification of *CPT3* and *ABH* described in this study  
153 fills the gap in the Dol biosynthetic route in Arabidopsis and makes the manipulation of Dol  
154 content in plants feasible. Consequently, an option for the generation of plant tissues with

155 increased Dol content as dietary supplements for individuals suffering from Dol-deficiency is  
156 emerging.

157

## 158 **RESULTS**

### 159 **Phenotypic variation in isoprenoid content among Arabidopsis accessions**

160 A set of 116 natural Arabidopsis accessions, originating from various geographical locations,  
161 was carefully selected for a detailed analysis of seven isoprenoid compounds (carotenoids,  
162 chlorophylls, Dols, phytosterols, plastoquinone, Prens, and tocopherols). Levels of seven  
163 selected isoprenoids were quantified in 3-week-old seedlings grown on solid Murashige-Skoog  
164 medium. For all analyzed accessions, the same profiles of isoprenoids were observed, however,  
165 their content differed remarkably. Thus, for all accessions, one ‘family’ of Prens composed of  
166 9 to 12 isoprene units (Pren-9 to -12, Pren-10 dominating) and one ‘family’ of Dols (Dol-15 to  
167 -18, Dol-16 dominating) were detected (Figure 2); however, the content of Prens and Dols  
168 revealed remarkable variation between accessions (Figure 3).

169

170

171

172

173

174

175

176

177

178

179



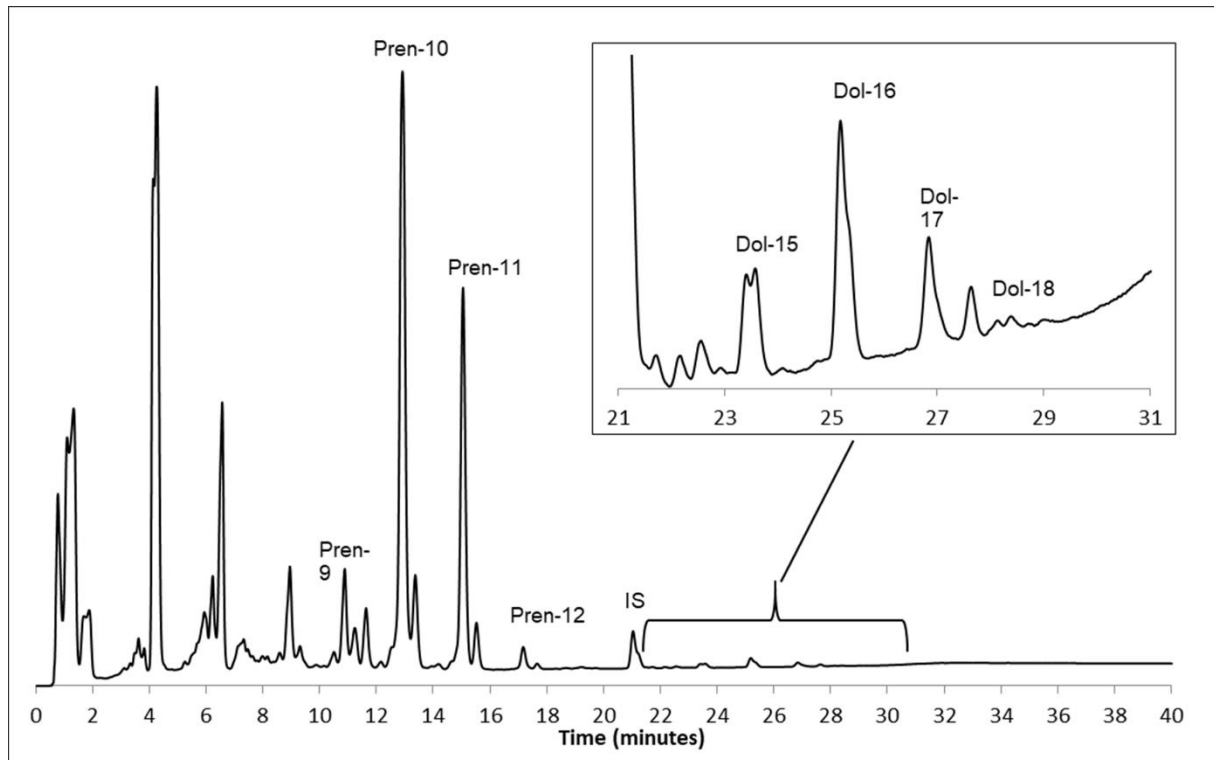

180

181

182 **Figure 2 with 3 supplements**

183 **Profiles of polyisoprenoid lipids: polyprenols (Pren) and dolichols (Dol, inset), from**  
184 **Arabidopsis Col-0 seedlings.** The same profile of polyisoprenoids was observed for all  
185 analyzed accessions. Signals corresponding to Pren-9 to -12 and Dol-15 to -18 were integrated  
186 to calculate the total amount of Prens and Dols, respectively. IS indicates the signal of the  
187 internal standard (Pren-14) (see Materials and methods and Source Data 1). Profiles of other  
188 isoprenoids (phytosterols, plastoquinone and tocopherols) are given in Figure 2-figure  
189 supplements 1-3 (see Source Data 2 and 3).

190 The highest difference in Pren content was observed for the accessions Est-1 and Uod-7 (20-  
191 fold), while in Dol content – for LL-0 and Bur-0 (4-fold). Similar observations were noted for  
192 the remaining isoprenoids – although the profile was the same for all accessions (Figure 2-  
193 figure supplements 1-3), their content revealed substantial differences (Figure 3-figure  
194 supplement 1). For phytosterols – 5-fold (Sav-0 vs. Est-1), for plastoquinone – 25-fold (Mr-0  
195 vs. Er-0), for tocopherols – 8-fold (Lip -0 vs. Edi-0), for carotenoids – 4-fold (Est-1 vs.  
196 CS22491) and for chlorophylls – 5-fold (Br-0 vs. CS22491) (Figure 3 - figure supplement 1).  
197 Detailed analyses revealed considerable differences in the content of 5 out of 7 analyzed  
198 compounds (i.e., Prens, Dols, phytosterols, carotenoids, and plastoquinone) between Est-1 and  
199 Col-0.

200

201

202

203

204

205

206

207

208

209

210

211

212

213

214

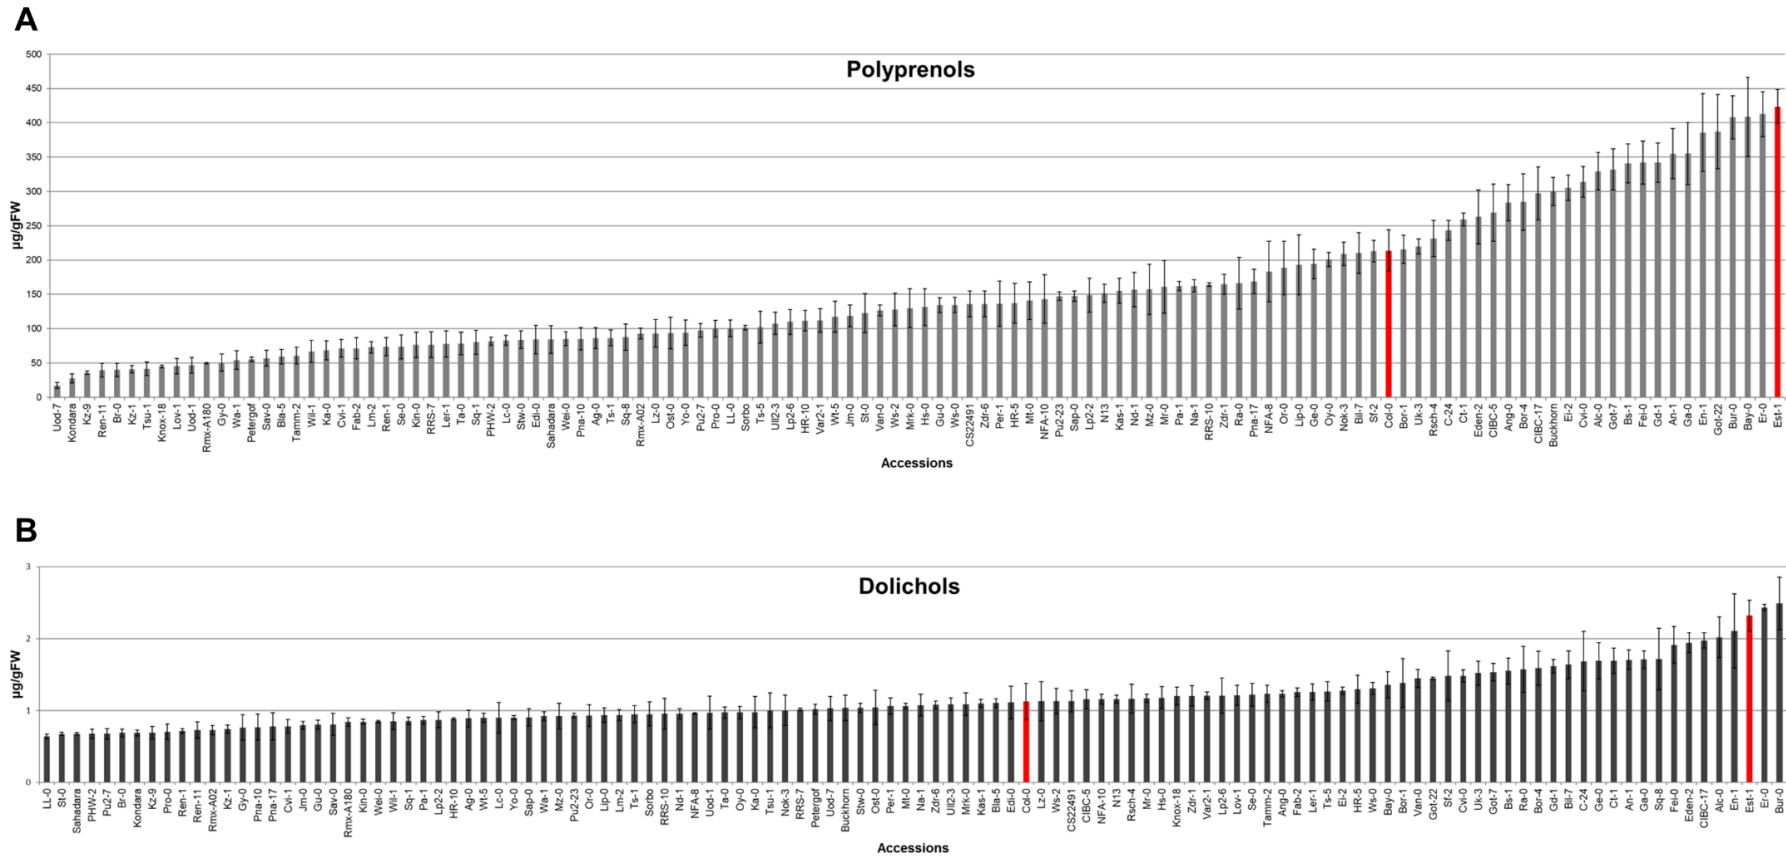

215

216 **Figure 3 with 1 supplement**

217 **Content of (A) polyprenols (Pren) and (B) dolichols (Dol) in Arabidopsis accessions.** Bars representing Col-0 and Est-1 are marked in red.

218 Shown are means ± SD (n=3) (Source Data 4). Content of other isoprenoids (chlorophylls, carotenoids, phytosterols, plastoquinone and

219 tocopherols) in the seedlings of Arabidopsis accessions are given in Figure 3-figure supplement 1 (Source Data 4).

220 Moreover, Est-1 and Col-0 are the parents of the advanced intercross recombinant inbred lines  
221 (AI-RILs) mapping population (EstC), which is an excellent resource for QTL analyses due to  
222 a large number of fixed recombination events and the density of polymorphisms  
223 (Balasubramanian et al., 2009). For these reasons, the EstC population was selected for further  
224 analyses in addition to the analysis of the natural accessions.

225

### 226 **Phenotypic variation in isoprenoid content in the AI-RIL mapping population**

227 Next, the seven isoprenoid compounds described above (carotenoids, chlorophylls, Dols,  
228 phytosterols, plastoquinone, Prens, and tocopherols) were quantified in 146 lines of the EstC  
229 mapping population and its parental lines (Col-0 and Est-1). The profiles of analyzed  
230 isoprenoids were similar to those described above for different accessions, while the content of  
231 particular compounds varied among lines of the mapping population (shown in details in Figure  
232 4, Figure 4-figure supplement 1, and Table 1). The range of the content of Prens (Figure 4A),  
233 Dols (Figure 4B) and other compounds (Figure 4-figure supplement 1) was broader than that  
234 observed for both parental lines, which might suggest that several loci within the EstC  
235 population contribute to this phenomenon and it may be explained by the presence of  
236 transgressive segregation.

237

### 238 **Estimation of the heritability of isoprenoid levels**

239 To identify the fraction of the observed variation that is genetically determined and whether it  
240 can be potentially mapped into QTLs, we estimated the broad sense heritability ( $H^2$ ) for each  
241 isoprenoid (Table 1) as described in the Material and Methods section. In the AI-RIL population,  
242 the broad sense heritability ranged from 0.33 (for Phytosterols) to 0.55 (for Pren and Dol) and  
243 0.57 (for Tocopherols) (Table 1).

244

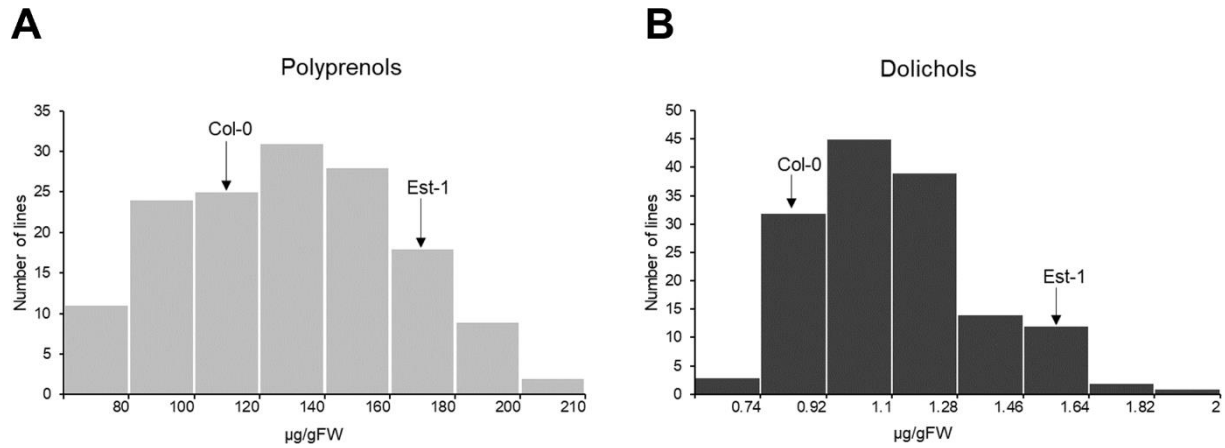

245

246

247 **Figure 4 with 1 supplement**

248 **Frequency distribution of the content of polyprenols (A) and dolichols (B) in the seedlings**

249 **of AI-RILs and their parental lines, Col-0 and Est-1 (see Source Data 5). Each bar covers**

250 **the indicated range of a particular isoprenoid compound. Frequency distribution of the content**

251 **of other isoprenoids (chlorophylls, carotenoids, phytosterols, plastoquinone and tocopherols)**

252 **are given in Figure 4-figure supplement 1 (Source Data 5).**

253 **Table 1**

254 Isoprenoid content: parental values, ranges, and heritabilities in the AI-RIL mapping population

255 (see Materials and methods and Source Data 5).

256

| Isoprenoid<br>compound<br>values [ $\mu\text{g/gFW}$ ] | Parental lines |               | AI-RILs   |                    |                           |
|--------------------------------------------------------|----------------|---------------|-----------|--------------------|---------------------------|
|                                                        | Col-0          | Est-1         | Range     | Median (quartiles) | Heritability <sup>a</sup> |
| Prenols                                                | 116 $\pm$ 10   | 179 $\pm$ 5   | 60 – 209  | 129 (104; 153)     | 0.55                      |
| Dolichols                                              | 0.9 $\pm$ 0.1  | 1.6 $\pm$ 0.5 | 0.7 – 2.0 | 1.1 (0.9; 1.2)     | 0.55                      |
| Chlorophylls                                           | 503 $\pm$ 29   | 250 $\pm$ 8   | 222 – 604 | 392 (349; 441)     | 0.42                      |
| Carotenoids                                            | 125 $\pm$ 18   | 75 $\pm$ 8    | 57 – 140  | 94 (84; 104)       | 0.43                      |
| Phytosterols                                           | 98 $\pm$ 11    | 125 $\pm$ 3   | 74 – 154  | 107 (97; 117)      | 0.33                      |
| Plastoquinone                                          | 99 $\pm$ 12    | 148 $\pm$ 12  | 50 – 176  | 111 (97; 127)      | 0.47                      |
| Tocopherols                                            | 138 $\pm$ 34   | 226 $\pm$ 36  | 76 – 288  | 142 (121; 163)     | 0.57                      |

<sup>a</sup>Measure of total phenotypic variance attributable to genetic differences among genotypes (broad sense heritability) calculated as  $V_G/(V_G+V_E)$ .

257

258

259

260

261

262

263

264

265

266

267 **Identification of QTLs for the accumulation of Dols, Prens, chlorophylls, and carotenoids**

268 The collected biochemical data for the EstC mapping population were subsequently used to  
269 map QTL regions underlying the observed phenotypic variation in isoprenoid accumulation.

270 We were able to map QTLs for four types of compounds (Prens, Dols, chlorophylls, and  
271 carotenoids). We detected three QTLs on chromosome 5 for Pren accumulation (Figure 5A)  
272 (127.3-133.4 cM, 166.5-170.8 cM, and 171.1-173.3 cM), explaining approximately 33% of the  
273 phenotypic variance explained (PVE) by these QTLs containing 948 loci (Table 2). For Dol,  
274 we detected a QTL region on chromosome 2 (Figure 5B) (64.8-74.4 cM) containing 308 loci  
275 (Table 2), which explains approximately 16.8% of the PVE.

276  
277 Two QTLs were detected for chlorophyll accumulation on chromosome 2 (160.8-191.6 cM)  
278 and 3 (111.6-188.1 cM) (Figure 5C), which together explain 16% of the PVE (Table 2). On  
279 chromosome 2, 3, and 5 (159.3-196.5 cM, 131.3-145.6 cM, and 151.3-187.2 cM, respectively)  
280 (Figure 5D) we identified three QTLs underlying the variation in carotenoid accumulation, as  
281 the whole model explains together almost 24% of the PVE (Table 2). It should be underlined  
282 that the QTL on chromosome 3 (for chlorophylls) and the QTL on chromosome 5 (for  
283 carotenoids) were included in this analysis despite the fact that their LOD scores were slightly  
284 below the threshold (below 3) (Figure 5C and Figure 5D, respectively). Interestingly, two of  
285 the QTLs identified for chlorophylls and carotenoids, localized on chromosomes 2 and 3, were  
286 overlapping.

287  
288

289  
290

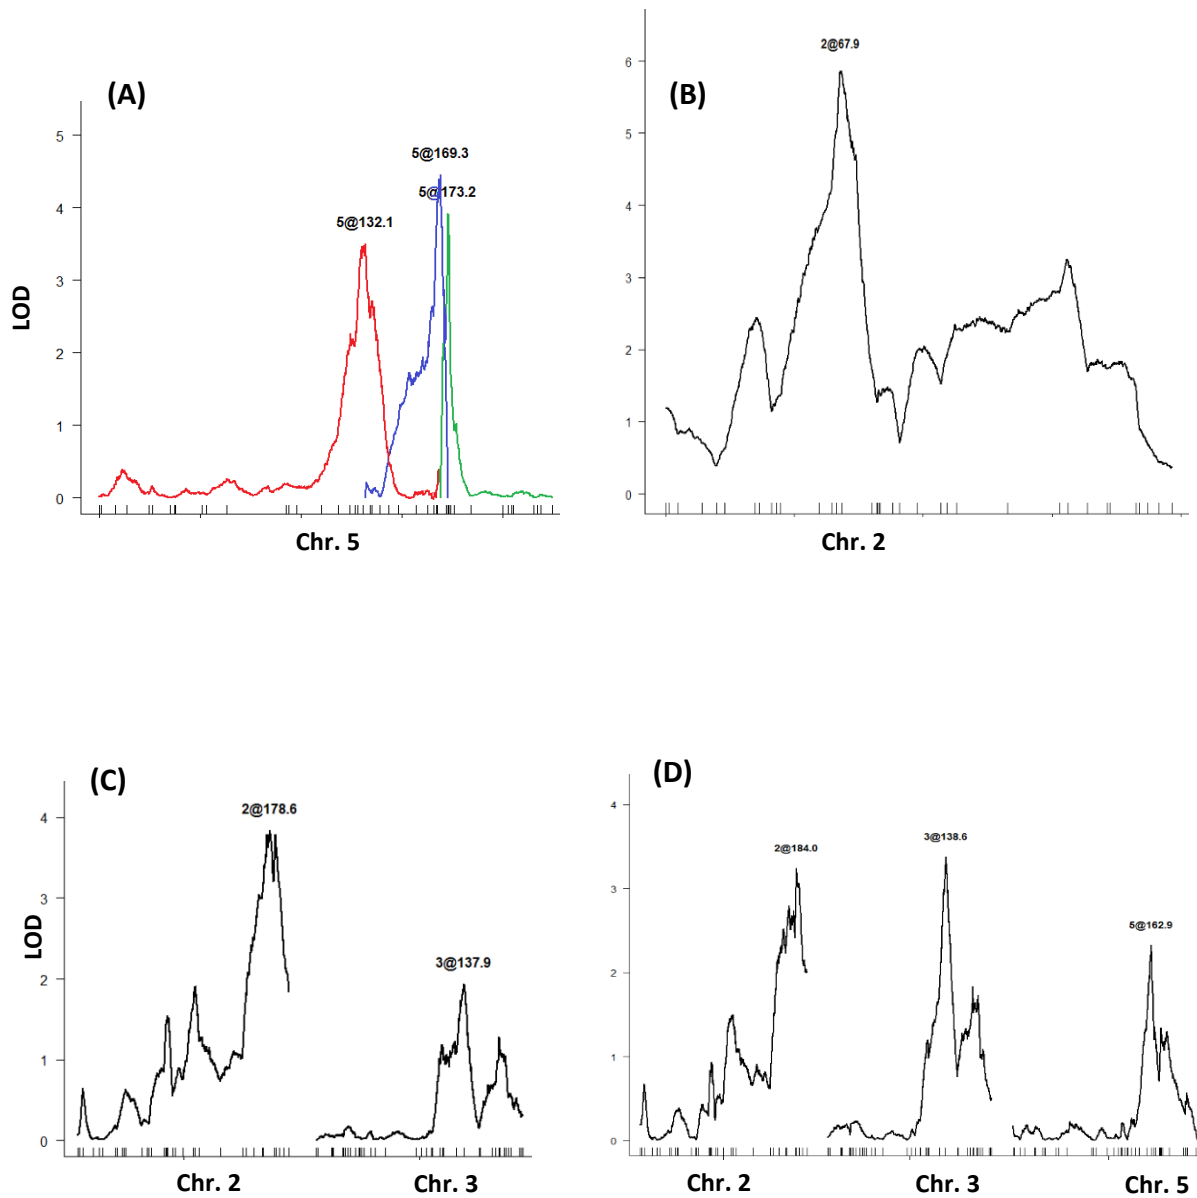

291  
292  
293  
294

295  
296  
297

298 **Figure 5**

299 **LOD profiles for QTLs underlying the accumulation of selected isoprenoids in the AI-**  
300 **RILs: (A) polyprenols, (B) dolichols, (C) chlorophylls, and (D) carotenoids (see Materials and**  
301 **methods and Source Data 6-9).**



302 **Table 2**

303 Characteristics of the detected QTLs underlying polyprenol (Pren), dolichol (Dol), chlorophyll  
 304 and carotenoid accumulation in the AI-RIL population (see Materials and methods and Source  
 305 Data 6-9).

| Trait        | QTL  | Chr <sup>a</sup> | LOD score | Peak <sup>b</sup> (cM) | Confidence interval <sup>c</sup> (cM) | Confidence interval (bp) | PVE <sup>d</sup> (%) | Number of genes |
|--------------|------|------------------|-----------|------------------------|---------------------------------------|--------------------------|----------------------|-----------------|
| Dolichols    | DOL1 | 2                | 5.86      | 67.9                   | 64.8 – 74.4                           | 7237666 –<br>8146712     | 16.88                | 308             |
| Polyprenols  | PRE1 | 5                | 3.506     | 132.1                  | 123.2 – 138.3                         | 13814976 –<br>15171769   | 9.60                 | 375             |
|              | PRE2 | 5                | 4.451     | 169.3                  | 166.5 – 170.7                         | 18065657 –<br>19123615   | 12.38                | 334             |
|              | PRE3 | 5                | 3.921     | 173.2                  | 172.1 – 174.1                         | 19123616 –<br>19715719   | 10.81                | 239             |
| Chlorophylls | CHL1 | 2                | 3.838     | 178.6                  | 160.8 – 191.6                         | 15251663 –<br>18694069   | 10.78                | 1370            |
|              | CHL2 | 3                | 1.937     | 137.9                  | 111.6 – 188.1                         | 11208231 –<br>22787413   | 5.28                 | 3658            |
| Carotenoids  | CAR1 | 2                | 3.241     | 184                    | 159.3 – 196.5                         | 15251663 –<br>19601673   | 8.20                 | 1745            |
|              | CAR2 | 3                | 3.373     | 138.6                  | 131.3 – 145.6                         | 16551391 –<br>18590589   | 8.55                 | 698             |
|              | CAR3 | 5                | 2.327     | 162.9                  | 151.3 – 187.2                         | 16259147 –<br>21318882   | 5.80                 | 1778            |

<sup>a</sup> Chromosome number; <sup>b</sup> Position of peak; <sup>c</sup> 1-LOD support interval; <sup>d</sup> Percentage of phenotypic variance explained by the QTL (PVE).

306

307 Our search also revealed two small QTL regions for phytosterols (data not shown); however,  
308 they were not analyzed further due to their statistical insignificance ( $LOD < 3.0$ ). Despite the  
309 large set of numerical data, no QTLs were identified for plastoquinone or tocopherols. This  
310 might indicate that the mapping population used in this study was not appropriate for  
311 investigating these metabolites.

312

### 313 **Selection of candidate genes from QTL mapping**

314 In order to select and prioritize positional candidate genes from the QTL confidence intervals,  
315 we conducted a literature screen and an *in silico* analysis (explained in more detail in the  
316 Materials and Methods section) that were based on functional annotations, gene expression data  
317 and tissue distribution of the selected genes. We analyzed loci from the Dol-associated QTL  
318 (DOL1) and from the three Pren-associated QTLs (PRE1, PRE2, PRE3). We selected the  
319 intervals that were characterized by the highest percentage of phenotypic variance related to  
320 each QTL and the highest LOD score values linked with the lowest number of loci (Table 2).  
321 As a result of the above-described procedure of selection and prioritization, we generated four  
322 sets of genes – three for Prens (Supplementary file 1) and one for Dol (Supplementary file 2).

323

324 Within a set of potential candidate genes for Pren regulation (Supplementary file 1), there was  
325 the AT5G45940 gene encoding the Nudix hydrolase 11 (Kupke et al., 2009) with putative IPP  
326 isomerase activity. For the regulation of Dol biosynthesis, we identified three loci that might be  
327 directly implicated in the process: AT2G17570, encoding a *cis*-prenyltransferase 3 (CPT3),  
328 AT2G17370, encoding HMGR2 (hydroxymethylglutaryl Coenzyme-A reductase 2, also called  
329 HMG2, a key regulator of the MVA pathway), and AT2G18620, encoding a putative GGPPS2  
330 (geranylgeranyl diphosphate synthase 2). A brief comment on the putative role of the two latter

331 genes in the Dol pathway is presented in Supplementary file 2, while an in-depth characteristics  
332 of AT2G17570 (*CPT3*) is presented below.

333

### 334 **The role of *CPT3* in Dol synthesis in Arabidopsis – genetic and biochemical studies**

335 Remarkably, the CPT responsible for the formation of the hydrocarbon backbone of the major  
336 Dols (Dol-15 to Dol-17) accumulated in Arabidopsis has not been identified yet. The  
337 AT2G17570 gene encoding *CPT3* (sometimes named *CPT1* (Kera et al., 2012)) is ubiquitously  
338 expressed in Arabidopsis organs and, among all nine AtCPTs, it is by sequence homology the  
339 closest counterpart of the yeast CPTs that synthesize Dols (Surmacz and Swiezewska, 2011).  
340 Preliminary *in vitro* studies revealed that *CPT3*, when co-expressed with *LEW1*, was capable  
341 of rescuing the growth defect of a yeast strain devoid of both yeast CPTs: *rer2Δ srt1Δ*, and a  
342 thus obtained yeast transformant was able to incorporate a radioactive precursor into  
343 polyisoprenoids, although their profile had not been presented (Kwon et al., 2016).

344

345 No T-DNA insertion mutant in the *CPT3* gene is available from the NASC collection. For this  
346 reason, to analyze *in planta* the involvement of *CPT3* in Dol formation, four independent RNAi  
347 lines targeting *CPT3* for mRNA knockdown (RNAi-1, -12, -14 and -23) and a transgenic line  
348 overexpressing *CPT3* (OE-7) were generated. The expression level of *CPT3* and the  
349 polyisoprenoid content were examined in 4-week-old leaves of these mutants. qRT-PCR  
350 analyses revealed that the *CPT3* transcript is significantly reduced (by 40-50%) in the four  
351 RNAi lines, and it is nearly 5-fold elevated in the OE line, in comparison to wild-type plants  
352 (Figure 6A).

353

354

355

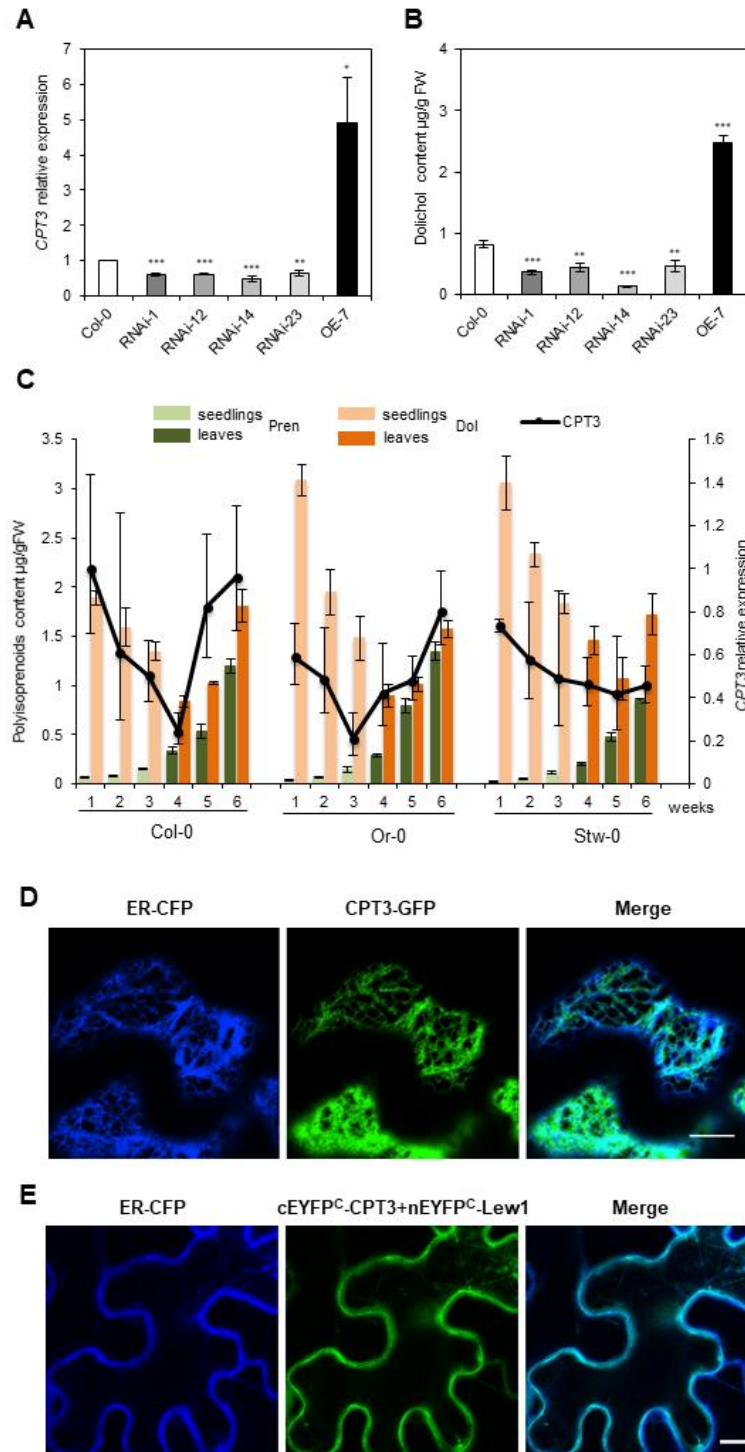

356

357 **Figure 6**

358 **Role of CPT3 in Dol biosynthesis – studies in planta.**

359 **(A)** Relative expression of *CPT3* and **(B)** content of dolichols (Dol-15 to Dol-17) in the leaves

360 of 4-week-old Arabidopsis plants, measured for wild-type Col-0, four independent RNAi lines

361 targeting *CPT3* (RNAi-1, -12, -14 and -23) and a *CPT3*-overexpressing line (OE-7). The results

362 are means ( $\pm$ SD) of three independent experiments. Asterisks indicate statistically significant  
363 differences between WT and mutant plants (\*  $0.01 < P < 0.05$ , \*\*  $0.001 < P < 0.01$ , \*\*\*  $P < 0.001$ ,  
364 Student's t-test) **(C)** Changes in the levels of *CPT3* mRNA (black curves) and in the content of  
365 Dols and Prens (respectively, orange and green bars) in the tissues of three *Arabidopsis*  
366 accessions: Col-0, Or-0, and Stw-0, during the plant life-span. Transcript levels and lipid  
367 content were estimated in *Arabidopsis* seedlings (1-3 weeks, bright colors) and leaves (4-6  
368 weeks, deep colors), shown are means  $\pm$  SD (n=3). Please note that the content of Prens is  
369 rescaled (0.01 multiples are presented) due to their high cellular level. **(D)** Co-localization of  
370 fluorescence signals of CPT3-GFP (green) and ER-CFP (compartmental marker, blue) upon  
371 transient expression in *Nicotiana benthamiana* leaves. Bar: 10  $\mu$ m. **(E)** Analysis of CPT3 and  
372 Lew1 protein-protein interaction using split yellow fluorescent protein (YFP) BiFC assay in  
373 tobacco leaf cells. Shown is the co-localization of fluorescence signals from the CPT1/Lew1  
374 complex (green) and from the compartmental marker ER-CFP (blue). Bar: 10  $\mu$ m. See Materials  
375 and methods and Source Data 10-17.

376 No visible phenotypic changes were observed between wild type plants and the studied mutant  
377 lines under standard growth conditions (data not shown). In contrast, HPLC/UV analysis of  
378 total polyisoprenoids revealed a significant decrease in dolichol (Dol-15 – Dol-17, dominating  
379 Dol-16) accumulation in *CPT3* RNAi lines – to approx. 50% of the WT for three lines (RNAi-  
380 1, -12, and -23) and to approx. 80% for RNAi-14. Not surprisingly, *CPT3-OE* plants  
381 accumulated significantly higher amounts of dolichols, reaching 300% of the WT levels (Figure  
382 6B). These results clearly suggest that *CPT3* is involved in the biosynthesis of the major family  
383 of Dols in Arabidopsis. In line with this, we observed a positive correlation between the level  
384 of *CPT3* transcript and the content of Dol during plant development for three of the selected  
385 accessions (Figure 6C). This further supports the role of *CPT3* in Dol formation; interestingly,  
386 no such correlation was noted for Prens (Figure 6C).

387  
388 *CPT3*, similarly to numerous other eukaryotic CPTs engaged in Dol biosynthesis (Grabińska et  
389 al., 2016), is located in the endoplasmic reticulum (ER), as documented by confocal laser  
390 microscopy – in transiently transformed *N. benthamiana* leaves the fluorescence signal of  
391 *CPT3*-GFP fully overlapped with that of the ER marker ER-CFP (Figure 6D).

392  
393 Finally, functional complementation of the yeast mutant *rer2Δ* by Arabidopsis *CPT3* followed  
394 by an analysis of the polyisoprenoid profile of transformants (Figure 7) revealed that solely co-  
395 expression of *CPT3* and *LEWI* (Arabidopsis homologue of mammalian NgBR and yeast Nus1,  
396 an accessory protein required for activity of some eukaryotic CPTs, Grabińska et al., 2016)  
397 resulted in the synthesis of the major family of Dols (Dol-14 to Dol-16, Dol-15 dominating,  
398 Figure 7A). Moreover, in line with the cellular function of Dol as an obligate cofactor of protein  
399 *N*-glycosylation, only simultaneous expression of *CPT3* and *LewI* fully rescued the defective  
400 glycosylation of the marker protein CPY in *rer2Δ* mutant cells (Figure 7B).

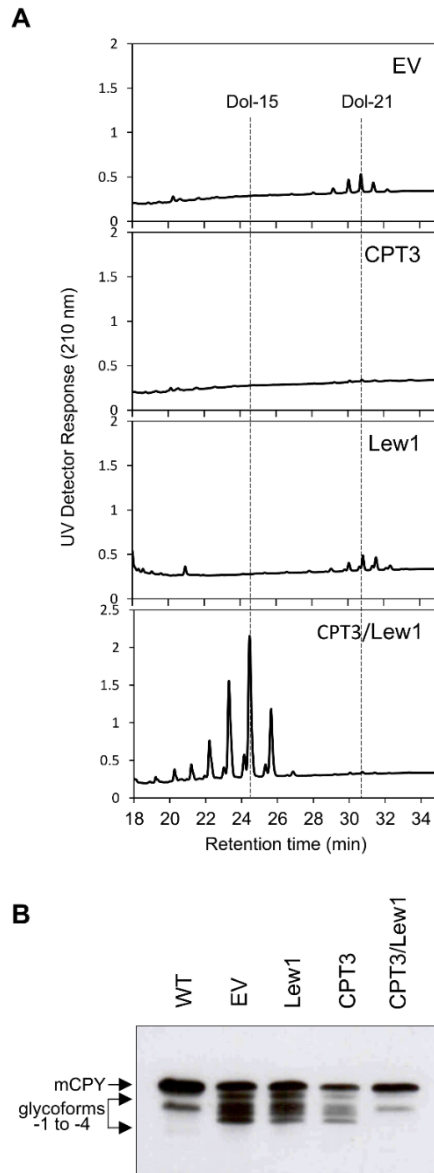

401

402 **Figure 7**

403 **Role of CPT3 in Dol biosynthesis – functional assay in yeast.**

404 *AtCPT3* was expressed in a *Saccharomyces cerevisiae* mutant strain devoid of Rer2 activity.

405 (A) Polyisoprenoid profiles and (B) glycosylation status of CPY analyzed for *rer2Δ*

406 transformed with empty vector, *CPT3*, *LEW1*, and *CPT3/LEW1*. Representative HPLC/UV

407 chromatograms are shown. The positions of mature CPY (mCPY) and its hypoglycosylated

408 glycoforms (lacking between one and four *N*-linked glycans, -1 to -4) are indicated. See

409 Materials and methods and Source data 18-19.

410 The physical interaction of CPT3 with Lew1 was confirmed *in planta* using a bimolecular  
411 fluorescence complementation (BiFC) assay. nEYFP-C1/CPT3 was transiently co-expressed  
412 with cEYFP-N1/Lew1 in *N. benthamiana* leaves. The signal of the enhanced yellow fluorescent  
413 protein (EYFP) was localized in the ER (Figure 6E).

414

415 Taken together, the genetic and biochemical data presented here clearly show that Arabidopsis  
416 CPT3 is a functional ortholog of yRer2 and this verifies the QTL mapping by demonstrating  
417 that CPT3 is responsible for Dol synthesis in Arabidopsis.

418

#### 419 **Genetic analyses of the variations in metabolite levels in natural accessions - GWAS**

420 As a following step, we used a multi-trait mixed model (Korte et al., 2012) to calculate the  
421 genetic correlations between the different traits studied (see Supplementary file 3). Here, we  
422 found a strong correlation for the four traits – Prens, phytosterols, plastoquinone, and Dols,  
423 which argues for a common genetic correlation of these four traits, and at the same time it shows  
424 that they have a negative genetic correlation with the remaining three traits, namely tocopherols,  
425 chlorophylls, and carotenoids.

426

427 Next, we used the mean phenotypic values of the 116 natural Arabidopsis accessions per trait  
428 to perform GWAS. Eighty-six of these lines have been recently sequenced as part of the 1,001  
429 genomes project and full sequence information is readily available (1001 Genomes Consortium,  
430 2016). For the remaining accessions, high-density SNP data have been published earlier  
431 (Horton et al., 2012). We used an imputed SNP dataset that combined both sets and has been  
432 published earlier (Togninalli et al., 2008). This data set contains ~ 4 million polymorphisms  
433 that segregate in the analyzed accessions. Two million polymorphisms, which had a minor  
434 allele count of at least 5, were included in the analysis. At a 5% Bonferroni corrected



435 significance threshold of  $2.4 \times 10^{-8}$ , significant associations have been found only for three of  
436 the seven different compounds analyzed (Dols, plastoquinone, and phytosterols), while no  
437 significant associations have been found for the other four compounds (chlorophylls,  
438 carotenoids, Prens, and tocopherols). In summary, 2, 7, and 5 distinct genetic regions were  
439 significantly associated with Dols, plastoquinone, and phytosterols, respectively. One region  
440 on chromosome 1 is found for all three traits. The respective Manhattan plots are shown in  
441 Figure 8 and Figure 8-figure supplement 1.

442

443

444

445

446

447

448

449

450

451

452

453

454

455

456

457

458

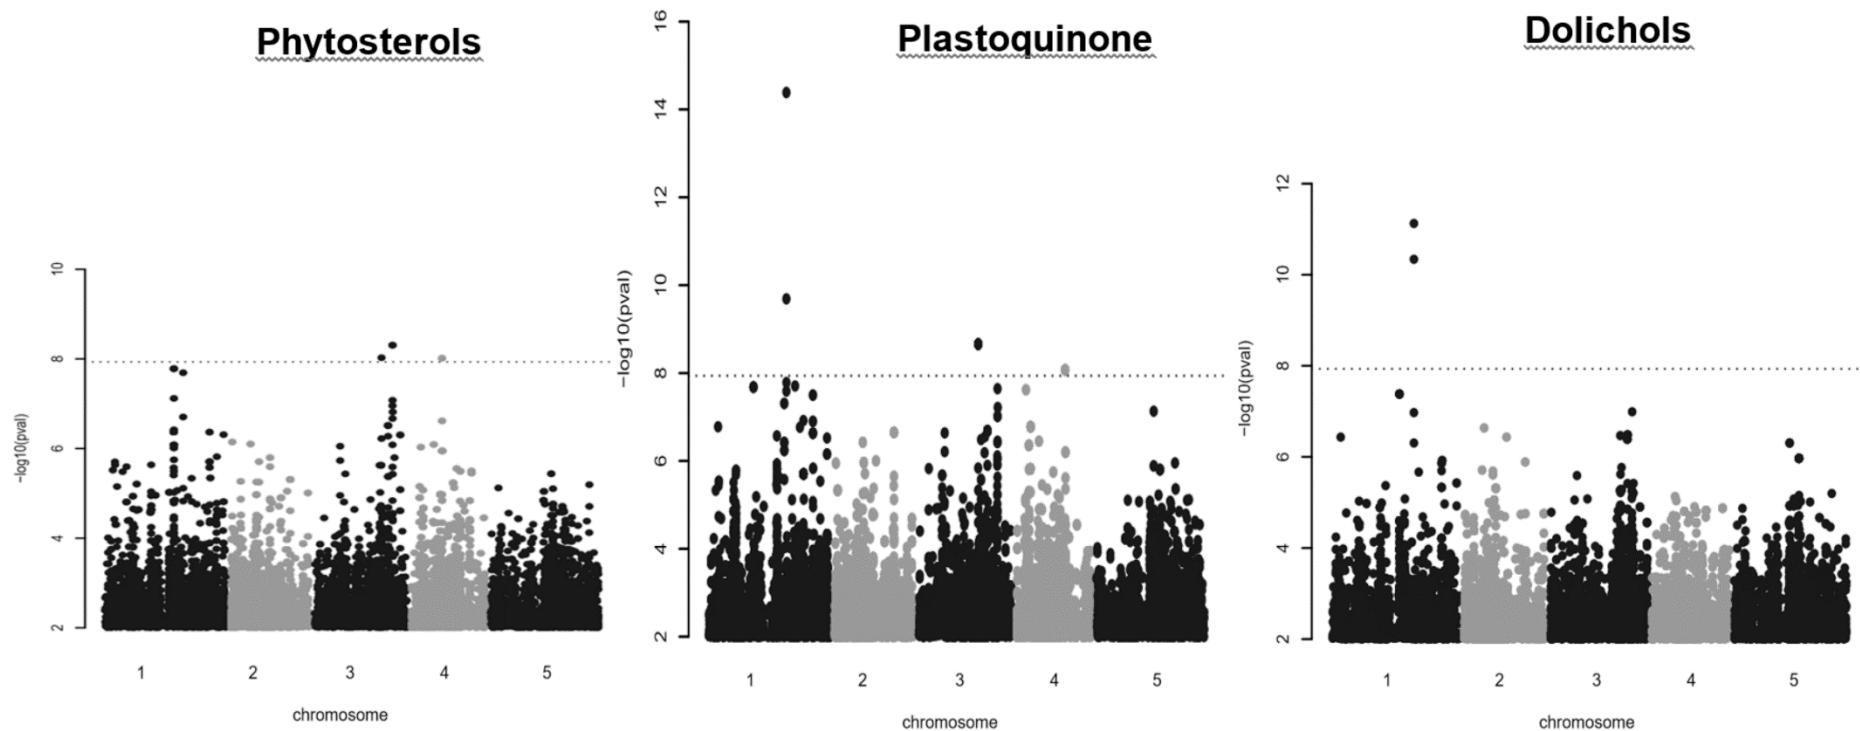

459

460 **Figure 8 with 1 supplement**

461 **Manhattan plot of genome-wide associations for phytosterols, plastoquinone, and dolichols.** The dotted horizontal lines indicate a significance  
 462 level of 0.05 after Bonferroni correction for multiple testing (see Materials and methods and Source Data 20). Manhattan plot of genome-wide  
 463 association results for polyprenols, chlorophylls and tocopherols are shown in Figure 8-figure supplement 1 (Source Data 20).

464 Summarizing, we found 4 SNPs, representing two different regions, that were associated with  
465 Dol content. The first of the associated polymorphisms is at position 19,545,459 on  
466 chromosome 1 and it codes for a non-synonymous AA-exchange (Q270K) in the first exon of  
467 AT1G52450, a gene involved in ubiquitin-dependent catabolic processes. The second  
468 polymorphism is located at position 19,540,865: it is upstream of AT1G52450 and in the 3'  
469 UTR of the neighboring gene AT1G52440, which encodes a putative alpha-beta hydrolase  
470 (ABH). A second putative ABH (AT1G52460) is also within 10 kb of these associations. The  
471 remaining two significant associations are on chromosome 3 (positions 18,558,714 and  
472 18,558,716, respectively) and they code for one non-synonymous (V113G) and one  
473 synonymous substitution in an exon of the gene AT3G50050, which encodes the auxin-related  
474 transcription factor Myb77 (Shin et al., 2007).

475

476 For plastoquinone, 26 SNPs, spread across 7 distinct genomic regions, have been found. The  
477 most significant SNP is located at chromosome 1 at position 19,545,459 and is identical to the  
478 one reported for Dol. Despite the fact that other significant SNPs are spread over 3 different  
479 chromosomes, they are all in linkage disequilibrium (LD) with each other, indicating only one  
480 independent association. And indeed, if the lead SNP is added as a cofactor to the model (Segura  
481 et al., 2012), none of the remaining SNPs stays above the threshold, indicating only one  
482 causative association. It is noteworthy that many of these other SNPs are directly located in  
483 transposable elements.

484

485 For phytosterols, 10 SNPs at 5 distinct genetic regions showed significant associations. One of  
486 these is again the same SNP that has been reported above for plastoquinone and Dols.  
487 Interestingly, this polymorphism does not show the strongest association with phytosterols, but  
488 three other sequence variants, located around 19.67 Mb on chromosome 3, are in perfect LD

489 and show a stronger association. These polymorphisms are located between AT3G53040,  
490 encoding a LEA protein, and AT3G53050, which encodes an enzyme involved in hydrolyzing  
491 *O*-glycosyl compounds.

492

493 The identification of AT1G52450 and two neighboring genes as putative regulators of the  
494 accumulation of Dols, plastoquinone, and phytosterols prompted us to analyze the phenotypes  
495 of the respective Arabidopsis T-DNA insertion mutants. Interestingly, a significant increase in  
496 the content of Dols (3- and 10-fold, respectively, comparing to control WT plants) was noted  
497 for two analyzed heterozygotic AT1G52460-deficient lines: SALK\_066806 and GK\_823G12.  
498 Moreover, in the SALK\_066806 line phytosterol content was also increased ( $167.8 \pm 20.3$  vs.  
499  $117.4 \pm 23.2$   $\mu\text{g/g}$  of fresh weight) and plastoquinone content was considerably decreased ( $27.3$   
500  $\pm 2.0$  vs  $56.7 \pm 5.2$   $\mu\text{g/g}$  of fresh weight). It is worth noting that mutations in the AT1G52460  
501 gene did not affect the content of Prens – this gene has not come up as a putative Pren regulator  
502 (Figure 9). Moreover, these mutant plants developed deformed, curled leaves (Figure 9-figure  
503 supplement 1). Other analyzed homozygotic mutants (carrying insertions in the genes  
504 AT1G52440 and AT1G52450) did not show significant differences neither in isoprenoid  
505 content nor in macroscopical appearance (data not shown).

506

507

508

509

510

511

512

513

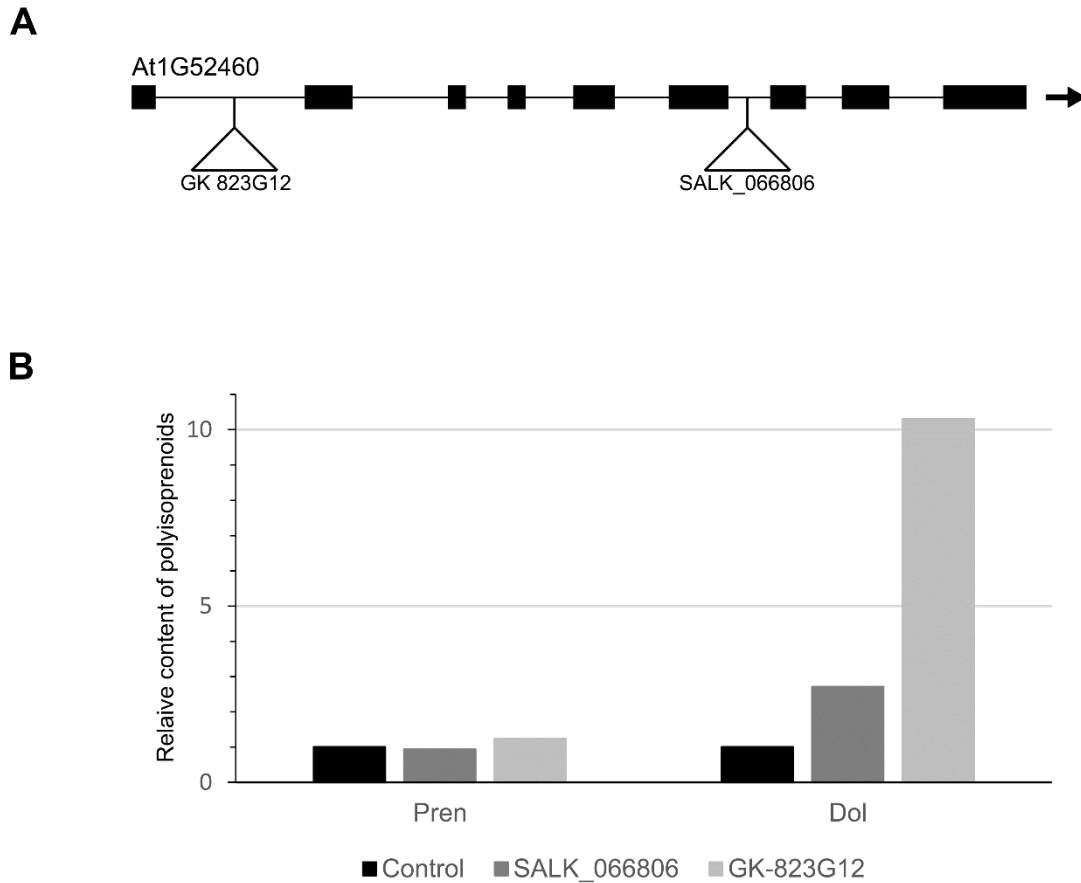

514

515 **Figure 9 with 1 supplement**

516 **Effect of AT1G52460 deficiency on the content of polyisoprenoids.**

517 (A) AT1G52460 gene structure, exons and introns are indicated by thick and thin lines,

518 respectively. The T-DNA insertion sites in two independent mutant lines: SALK\_066806 and

519 GK\_823G12 are depicted. (B) The relative content of Dols and Prens estimated in leaves of 3-

520 week-old plants using HPLC/UV (representative results are shown, see Source Data 21). The

521 phenotypic appearance of 4-week-old detached leaves of AT1G52460-deficient line

522 (SALK\_066806, *abh* heterozygous mutant) and wild-type (Col-0) plants grown in soil is shown

523 in Figure 9-figure supplement 1.

524 **Correlation analyses of isoprenoid accumulation in the various accessions and in the**  
525 **mapping population- a statistical meta-analysis**

526 As a final step, we conducted a detailed statistical meta-analysis of the studied traits in the  
527 different Arabidopsis accessions and in the lines of the EstC mapping population. Numerous  
528 correlations were found for the content of seven isoprenoid compounds estimated in the  
529 seedlings of natural accessions and the mapping population (Figure 10A and 10B, respectively).  
530 Moreover, we clearly identified some outliers (Grubbs test at significance level  $\alpha=0.001$ )  
531 (Grubbs 1950). For plastoquinone, seven values corresponding to three accessions (Er-0, Est-  
532 1, and Fei-0) were unequivocally assigned as outliers, for carotenoids – three values  
533 corresponding to a single accession (Ren-1), for phytosterols a single outlier was identified in  
534 the natural accessions and for Dols in the mapping population (Figure10-figure supplement 1).  
535 All these outliers, denoted by red triangles in Figure 10, were filtered out in the statistical  
536 analysis of metabolite distribution and the correlation analyses (Figure 10A and 10B). For both  
537 datasets, the analysis of metabolite correlations revealed the highest correlation for chlorophylls  
538 vs. carotenoids ( $R>0.97$ ), while four other metabolites – phytosterols, Prens, plastoquinone, and  
539 Dols – also correlated with each other significantly ( $p<0.0001$ ). Tocopherol accumulation  
540 correlated only occasionally with the other metabolites (Supplementary file 4). Based on the  
541 structural similarity between Prens and Dols, some level of similarity between the mechanisms  
542 regulating their accumulation might be expected. However, the obtained values for the  
543 correlation between Prens and Dols among the tested accessions (0.325,  $p=0.0001$ ) and among  
544 the AI-RILs (0.608,  $p=0.0001$ ) suggest that some differences exist between these two subgroups  
545 of polyisoprenoids.

546

547 Importantly, all the strongest genetic correlations detected for particular metabolites  
548 (Supplementary file 3) were also identified as the most significant ( $p <0.0001$ ) for metabolic

549 data-based analysis and this is valid both for the natural accessions and for the EstC mapping  
550 population lines (Supplementary file 4). Moreover, a consistent trend of correlations (either  
551 positive or negative) between individual metabolites in the natural accessions was observed for  
552 both genetic- and metabolic-based analysis (Supplementary files 3 and 4). Taken together,  
553 results of the meta-analysis indicate genetic co-regulation of the biosynthesis of specific  
554 isoprenoids.

555

556

557

558

559

560

561

562

563

564

565

566

567

568

569

570

571

572

573

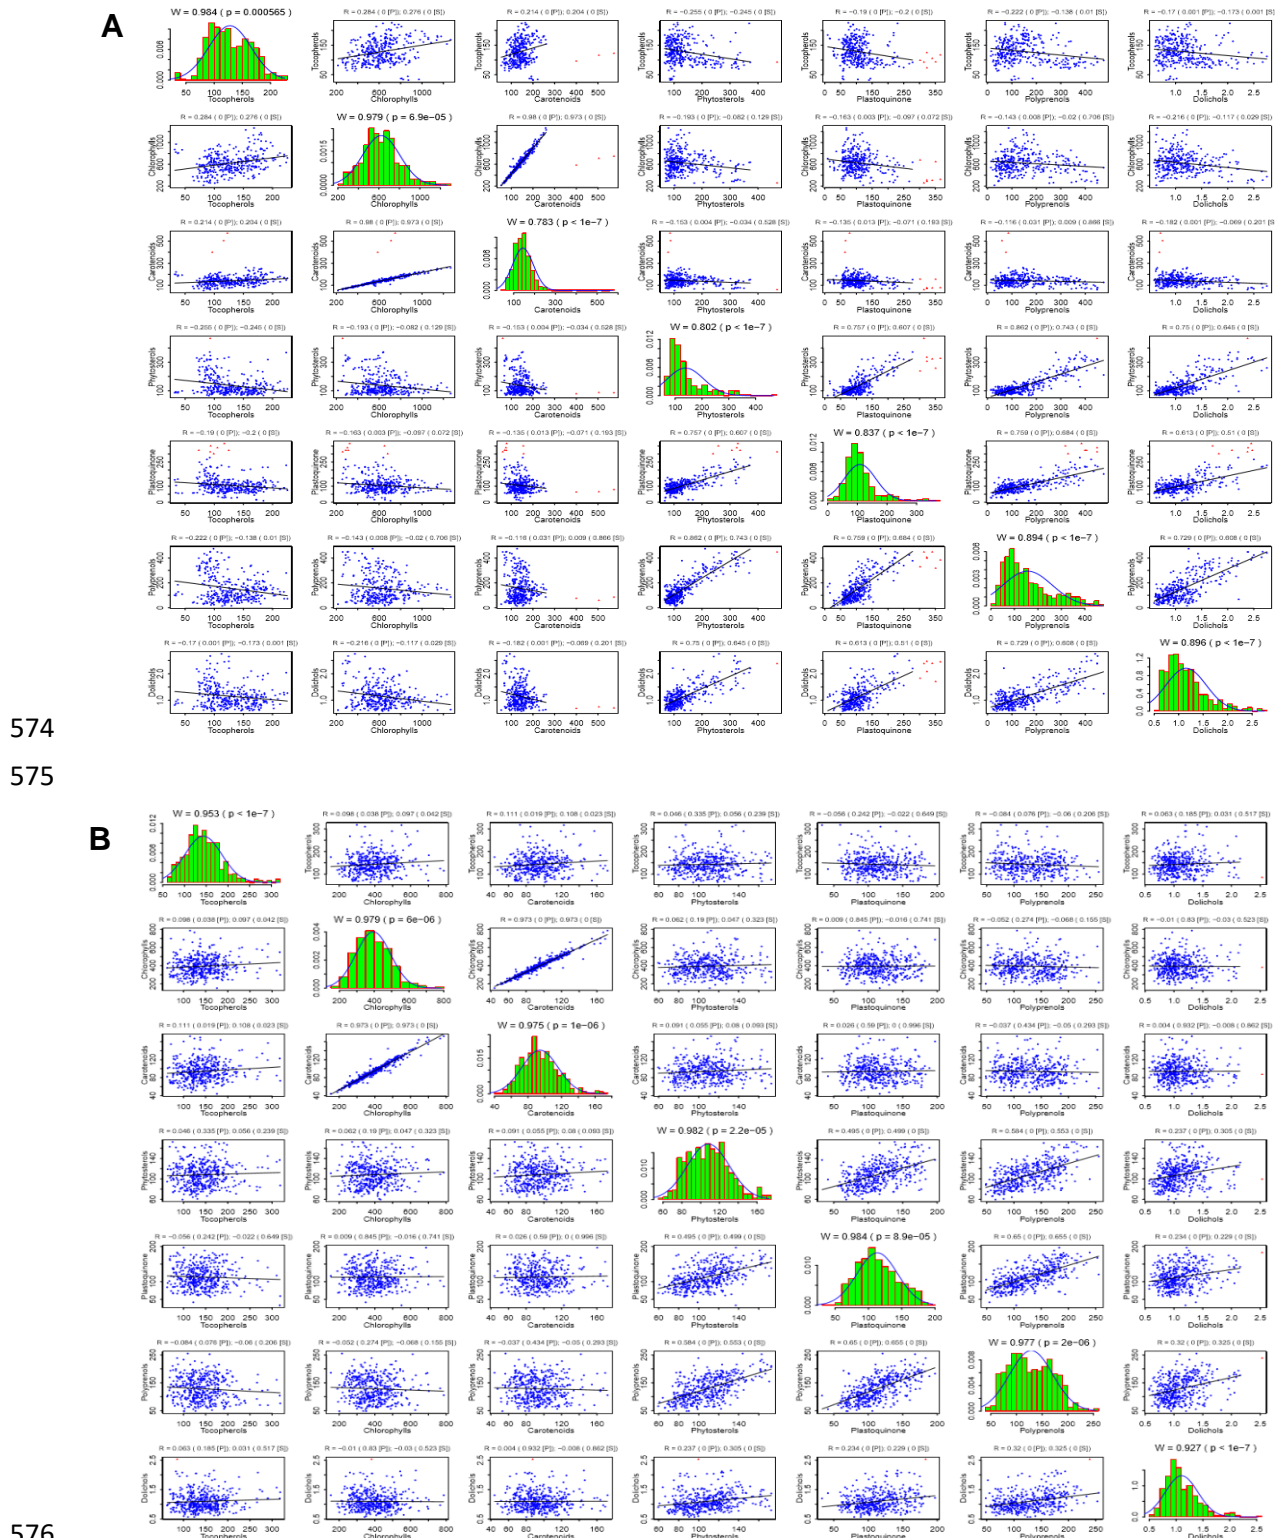



581 (green bars), together with the approximation of the normal distribution of the data (blue curve)  
582 with outliers removed, are presented on the diagonal. Correlation patterns for each metabolite  
583 pair are presented at the appropriate intersection; please note that outliers (red dots) were not  
584 taken into consideration for the analysis. Above each diagonal panel, the Shapiro-Wilk statistics  
585 (W, p) for normal distribution is presented, while for out-of-diagonal panels Pearson (P) and  
586 Spearman (S) correlation coefficients together with the associated significance levels are shown  
587 (please note that '0' means  $p < 1e-7$ ). Bearing in mind the statistically significant deviations  
588 from normal distribution shown in the diagonal panels, the significance of the observed  
589 correlations should be interpreted in terms of the Spearman rather than Pearson coefficient (see  
590 Materials and methods and Source Data 22). Cumulative distribution functions (CDF) of the  
591 content of seven studied metabolites analyzed in the seedlings of Arabidopsis accessions and  
592 AI-RILs are shown in Figure 10-figure supplement 1 (Source Data 22).

593 Next, we conducted hierarchical clustering, in which the correlation matrix was used as a  
594 measure of the distance between metabolites in the natural accessions and the mapping  
595 population. This clearly showed relationships between metabolite levels (Figure 11), which  
596 might reflect coupling(s) in their biosynthetic pathways (Figure 12). Thus, chlorophylls and  
597 carotenoids were the most closely related compounds (Figure 11), while phytosterols,  
598 plastoquinone, and Prens formed a separate cluster, which was also attracting the Dol cluster.  
599 The Dol cluster was, however, much more distant from the three other metabolites. The most  
600 distant cluster was comprised of tocopherols and it did not seem to correlate significantly with  
601 any other metabolite. A small disagreement between the trees deduced for the natural accessions  
602 or for the EstC mapping population was found concerning the location of phytosterols and  
603 plastoquinone vs. Prens (Figure 10B and Figure 11).

604

605

606

607

608

609

610

611

612

613

614

615

616

617

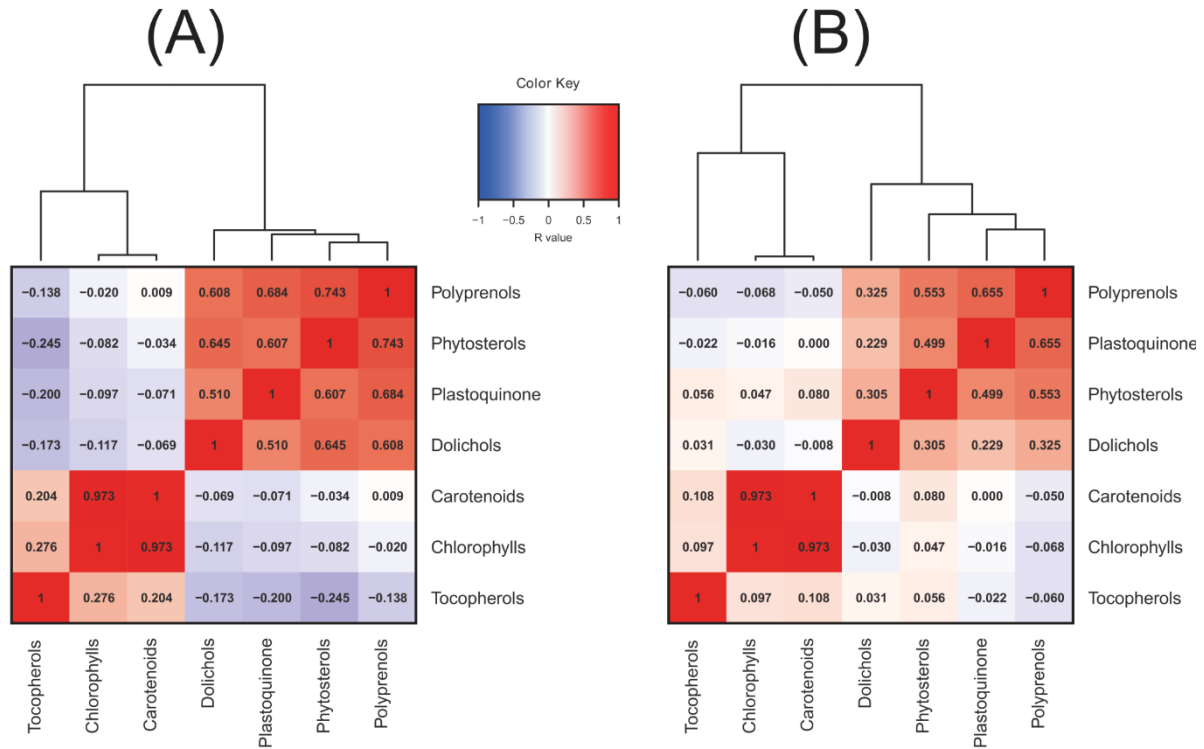

618

619

620 **Figure 11. Dendrograms and corresponding heatmaps calculated for the accessions (A)**

621 **and the mapping population (B).** Hierarchical cluster analysis was performed for correlation

622 matrixes (built of Spearman's rank correlation coefficients, R) using the Lance-Williams

623 dissimilarity update formula according to Ward's clustering algorithm (Ward J, 1963) (see

624 Materials and methods and Source Data 22).

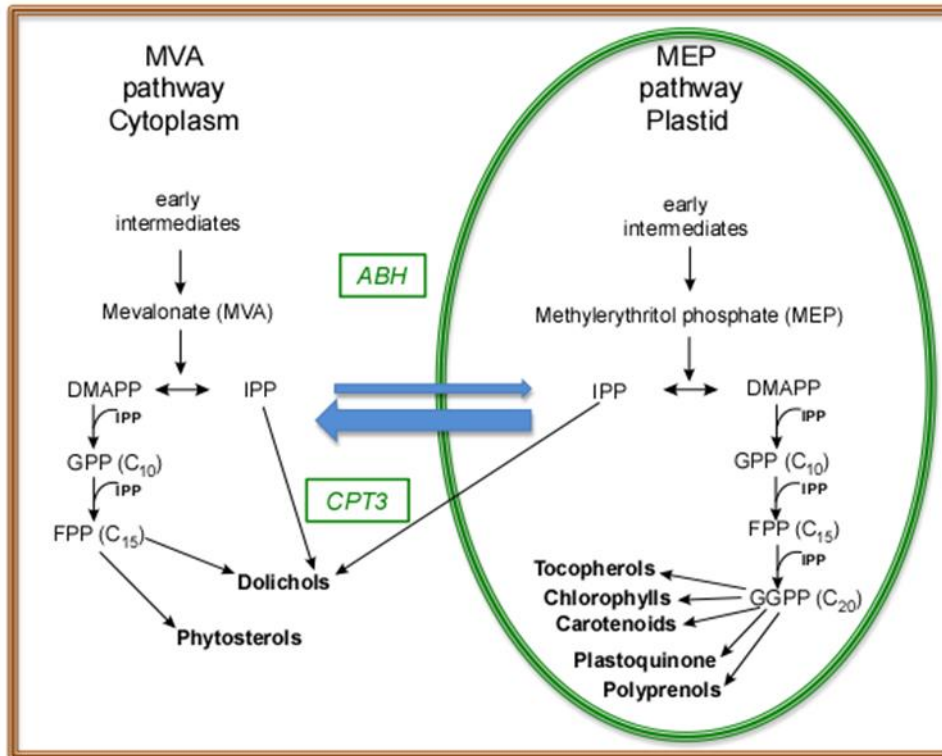

625

626

627 **Figure 12. Biosynthetic routes leading to isoprenoids in a plant seedling cell; the**  
628 **involvement of the genes *cis*-prenyltransferase 3 (*CPT3*) and alpha-beta hydrolase (*ABH*)**  
629 **is indicated.** Depicted are seven metabolites analyzed in this study. Two pathways, the  
630 mevalonate (MVA) and methylerythritol phosphate (MEP) pathways, are generating IPP in  
631 parallel, both contributing to particular isoprenoids (Hemmerlin et al., 2012; Akhtar et al., 2017;  
632 Jozwiak et al., 2017). Blue arrows illustrate the exchange of intermediates between the MVA  
633 and MEP pathways. Abbreviations: DMAPP-dimethylallyl diphosphate, FPP-farnesyl  
634 diphosphate, GPP-geranyl diphosphate, GGPP-geranylgeranyl diphosphate, IPP-isopentenyl  
635 diphosphate.

636 **DISCUSSION**

637 *Genetic basis of Dol accumulation*

638 A broad data set presented here shows that isoprenoid levels in Arabidopsis accessions are  
639 highly diverse. Estimated heritabilities from GWAS are non-zero for the analyzed traits,  
640 suggesting the existence of genetic factors underlying their accumulation. Our results also  
641 demonstrate the usefulness of the natural variation of Arabidopsis for identifying new loci  
642 underlying specific phenotypic traits.

643  
644 It is intriguing that we could detect QTLs for four different compounds: Prens, Dols,  
645 chlorophylls, and carotenoids, while we found significant GWAS associations for three:  
646 phytosterols, plastoquinone, and Dols. Consequently, Dols are the only compounds where both  
647 approaches detected associations. Still, the reported QTL on chromosome 2 does not overlap  
648 with the GWAS results, which are located on chromosomes 1 and 3, respectively (summarized  
649 in Supplementary file 5). While, at a first glimpse, this lack of accordance might be disturbing,  
650 there could be many good reasons for it. It is well known that both methods have different  
651 power to detect associations (see Figure 4 in Weigel and Nordborg, 2015). For example, on  
652 chromosome 1, we identified a significant GWAS association for three different compounds,  
653 but we detected no corresponding QTL in the mapping population despite the fact that the  
654 associated polymorphism segregates in the AI-RIL population. The three traits for which this  
655 association is detected (the content of phytosterols, plastoquinone, and Dols) show a strong  
656 genetic correlation, so one would expect to find shared genetic factors that regulate all three  
657 traits, despite a slightly lesser phenotypic correlation of the traits. The associated sequence  
658 variant is located in the gene AT1G52450, which is thus an excellent candidate to modulate all  
659 three traits and would not have been found using QTL mapping alone. AT1G52450 is annotated  
660 to encode a ubiquitin carboxyl-terminal hydrolase (UCH)-related protein, while the neighboring

661 gene AT1G52460 encodes an alpha-beta hydrolase, ABH (PubMed Gene database). Neither of  
662 these proteins has been characterized yet. Eukaryotic cells usually possess a family of UCHs  
663 (e.g., three in Arabidopsis) (Isono and Nagel, 2014) responsible for releasing ubiquitin (Ub)  
664 from ubiquitinated proteins. A tight balance between ubiquitination and deubiquitination is  
665 required for cellular survival since ubiquitin controls numerous bioactivities, such as protein  
666 degradation by the 26S proteasome, cell cycle regulation, signal transduction, or membrane  
667 trafficking. In turn, the ABH superfamily proteins are found across all domains of life. They  
668 are implicated in primary and secondary metabolism by serving highly diverse enzymatic  
669 activities, e.g., as esterases, thioesterases, lipases, proteases. Additionally, proteins with the  $\alpha/\beta$   
670 hydrolase fold function as receptors in the strigolactone, gibberellin and karrikin-smoke  
671 response pathways (Mindrebo et al., 2016 and references therein). In Arabidopsis, more than  
672 600 proteins with ABH folds have been predicted by the InterPro database (Mitchell et al.,  
673 2019) with the majority remaining uncharacterized.

674

675 Taken together, hydrolytic enzymes, as ABH, encoded by AT1G52460, and/or UCH, encoded  
676 by AT1G52450, and putative ubiquitinating enzymes (respective genes detected by QTL,  
677 Supplementary file 1 and 2) might constitute a regulatory loop controlling isoprenoid  
678 biosynthesis in eukaryotic cells. Interestingly, both *ABH* and *UCH* show a high dN/dS ratio  
679 (ratio of nonsynonymous to synonymous divergence) in the Arabidopsis population, arguing  
680 for strong selection on these genes (see Supplementary file 6). Further studies are needed to  
681 identify the cellular target(s) of AT1G52460 and the mechanisms underlying its involvement  
682 in the metabolism of Dol, phytosterol, and plastoquinone.

683

684 It is worth noting that in previous reports, the AT1G52460 gene was identified as one of the  
685 maternally expressed imprinted genes (MEGs) that was shown to be predominantly expressed

686 from maternal alleles in reciprocal crosses (Wolff et al., 2011). Notably, the AT1G52460 was  
687 among the MEGs (~30% of all the MEGs tested in that study) for which authors reported a  
688 dN/dS value greater than one (Wolff et al., 2011). The dN/dS value can be used to measure the  
689 rate of molecular evolution of genes (Warren et al., 2010); therefore the results of Wolff et al.  
690 (2011) provide particularly strong evidence for the fast evolution of AT1G52460. Taking into  
691 account that we detected only heterozygotic lines for the AT1G52460 gene, we consider that a  
692 loss-of-function allele may lead to a lethal phenotype. This finding could be particularly  
693 important and it deserves further investigation since very few imprinted genes have been  
694 confirmed in plants and even fewer of them have been functionally investigated (He et al., 2017).

695

696 The confidence intervals of the detected QTLs include hundreds of different genes. This is  
697 within the typical mapping resolution of QTL studies but leads to the problem of prioritizing  
698 candidate genes. The most promising gene identified in the QTL analysis, AT2G17570 (*CPT3*),  
699 is a long searched enzyme responsible for backbone synthesis for the major family of dolichols  
700 in Arabidopsis, with Dol-15 and Dol-16 dominating. Interestingly, the different product  
701 specificity of the Arabidopsis enzymes CPT3, CPT6 (which produces *in planta* a single Dol-7  
702 (Surmacz et al., 2014)) and the recently characterized CPT1 (producing a family of Dols with  
703 Dol-21 dominating) suggests that the particular AtCPTs play dedicated, non-redundant roles in  
704 isoprenoid synthesis in Arabidopsis tissues. For further comments regarding CPT3 see also  
705 Supplementary file 6.

706

707 Despite the fact that no overlapping associations have been found for the GWAS and QTL  
708 results, one can try, using the GWAS results, to prioritize candidate genes in the QTL interval.  
709 In the confidence interval of the detected QTL for Dol on chromosome 2, we could analyze  
710 6,668 independent segregating polymorphisms with a minor allele frequency greater than 5%.

711 None of these reached the genome-wide significance threshold; the most significant  
712 polymorphism had a p-value of  $4.88 \times 10^{-6}$  and was located in the proximity of AT2G17570,  
713 which encodes CPT3. Although this score is marginal, it is locally significant, if we restrict our  
714 analysis to sequence variants within the QTL region. So the combined results of GWAS and  
715 QTL strongly indicate that *CPT3* is the gene underlying the detected QTL for Dol, despite the  
716 plethora of other tempting candidate genes. Detailed SNP analyses of *CPT3* revealed that this  
717 gene shows a high amount of variation with a total number of 30 non-synonymous substitutions  
718 and 5 alternative starts and 1 premature stop codon in the Arabidopsis population  
719 (Supplementary file 6).

720

### 721 *Trait correlations*

722 Strong correlations between the levels of particular metabolites (Figure 10 and Figure 11)  
723 probably mirror common regulatory mechanisms responsible for their formation. Despite the  
724 fact that all studied metabolites are derived from the isoprenoid pathway, their clustering  
725 reflects the complexity of this pathway (Figure 12) and supports the notion of channeling of  
726 substrates and intermediates described earlier as ‘metabolons’ (Newman and Chappell, 1999).  
727 Thus, the tight (‘perfect’) association of carotenoids and chlorophylls is in agreement with their  
728 intimately linked function in photosynthesis, as well as their biosynthetic origin from a common  
729 isoprenoid precursor, geranylgeranyl diphosphate (GGPP), and the plastidial localization of  
730 their biosynthesis (Figure 12). Moreover, IPP molecules required for the synthesis of  
731 carotenoids, chlorophylls, and plastoquinone are thought to be derived mostly from the  
732 methylerythritol phosphate (MEP) pathway and several, but not all, steps of their synthesis are  
733 located in plastids too. Prens seem to cluster more closely with plastoquinone than with Dols  
734 (Figure 11), despite the high similarity of Pren and Dol structure. Interestingly, a growing body  
735 of information suggests that the biosynthetic routes for Prens and Dols in plants are different.



736 Prens are synthesized in plastids (Akhtar et al., 2017), probably from MEP-derived IPP, while  
737 Dols are synthesized consecutively in plastids and in the cytoplasm (Skorupinska-Tudek et al.,  
738 2008; Jozwiak et al., 2017) with the concomitant involvement of the MEP and MVA pathways  
739 (Figure 12). Thus, the assignment of Prens and Dols to distinct clusters and the calculated  
740 dendrogram are in line with the described above differences in their biosynthetic routes.

741

## 742 **CONCLUSIONS**

743 In this study several candidate genes for potential new factors that might regulate  
744 polyisoprenoid accumulation have been identified. The regulation of isoprenoid pathways is  
745 complex, but using the combination of both GWAS and QTL it is possible to prioritize the  
746 underlying genes.

747

748 Understanding of the mechanisms of Dol synthesis/accumulation in eukaryotes is important  
749 since the shortage of dolichol/dolichyl phosphate results in serious defects in all studied  
750 organisms, most probably caused by defective protein glycosylation. In plants, it is lethal due  
751 to male sterility (Jozwiak et al., 2015; Lindner et al., 2015) while in humans mutations in genes  
752 encoding enzymes involved in Dol/DolP synthesis lead to rare genetic disorders collectively  
753 called Congenital Disorders of Glycosylation (CDG type I); supplementation of the diet with  
754 plant tissues that can be utilized as a source of dolichol/dolichyl phosphate has been suggested  
755 (summarized in Buczkowska et al., 2015). The identification of genes regulating the  
756 synthesis/accumulation of Dols – such as the here detected *CPT3* and *ABH* – opens a  
757 perspective for the manipulation of Dol content in plants and consequently makes it feasible to  
758 think of constructing plants with increased Dol content.

759

760

## 761 MATERIALS AND METHODS

### 762 Plant materials

763 *Arabidopsis thaliana* accessions used in this study are listed in the Supporting Information  
764 (Supplementary file 7). All accessions were obtained from the stock center NASC  
765 (<http://arabidopsis.info/>).

766

767 A population of advanced intercross recombinant inbred lines (AI-RIL, EstC) was obtained  
768 after crossing of the Est-1 (Estland) and Col-0 (Columbia) accessions (Balasubramanian et al.,  
769 2009). All lines were kindly provided by Maarten Koornneef from Max Planck Institute for  
770 Plant Breeding Research in Cologne, Germany. The EstC mapping population with all sequence  
771 variant database is available at the NASC under the stock number CS39389.

772

773 For miRNA-mediated knockdown of the *CPT3* gene, two pairs of primers specific to amiRNA  
774 and amiRNA\* targeting the gene were designed using the Web MicroRNA Designer WMD3.  
775 The vector pRS300 was used as a template for subsequent PCR amplification and replacement  
776 of the endogenous miR319a and miR319a\* sequences with appropriate amiRNA and amiRNA\*  
777 of *CPT3* as described in the website protocol [wmd3.weigelworld.org](http://wmd3.weigelworld.org) (Ossowski Stephan, Fitz  
778 Joffrey, Schwab Rebecca, Riester Markus and Weigel Detlef, personal communication). The  
779 obtained stem-loop was used as a template for PCR to generate the 454 bp fragment with a  
780 CACC overhang at the 5' end, which was used for directional cloning into the pENTR/D-TOPO  
781 vector system (Invitrogen). The recombination reaction from pENTR/D-TOPO to the  
782 pGWB602 binary vector was carried out with the Gateway LR clonase II system (Invitrogen).  
783 All primers used in the construction of the *AtCPT3* silencing vector are listed in Supplementary  
784 file 8. The obtained plasmid was introduced into *Agrobacterium tumefaciens* strain GV3101,  
785 which was then used to transform *Arabidopsis* (Col-0) by the floral dip method (Weigel and

786 Glazebrook, 2002). T1 seeds were germinated on soil and transgenic plants were selected by  
787 spraying with 0.1% BASTA in the greenhouse. Spraying was performed one week after  
788 germination and was repeated two times at two-day intervals. Additionally, the plants that  
789 survived were verified by PCR.

790

791 AtCPT3-over-expressing lines (*CPT3-OE*) were generated using a 35S::AtCPT3 construct  
792 introduced into the *A. tumefaciens* GV3101 strain. Transformation of Arabidopsis (Col-0)  
793 plants was performed by the floral dip method (Weigel and Glazebrook, 2002). Transformant  
794 selection was performed as described previously (Surowiecki et al., 2019).

795 The T-DNA insertion mutant lines for AT1G52460, SALK\_066806 and GK\_823G12, were  
796 obtained from the Nottingham Arabidopsis Stock Center, their progeny were genotyped, and  
797 heterozygous lines were isolated.

798

### 799 **Growth conditions**

800 Plants were grown in a growth chamber in a long day (16 h light) photoperiod at 22 °C/18 °C  
801 at day/night. The seeds were surface-sterilized by treatment with an aqueous solution of 5%  
802 calcium hypochlorite for 8 min, subsequently rinsed four times with sterile water and planted  
803 on plates. Before location in the growth chamber, plates with seeds were kept for 4 days at 4 °C  
804 in darkness for stratification. The Arabidopsis accessions, the AI-RIL mapping population and  
805 the T-DNA insertion mutant lines were grown on Petri dishes on solid ½ Murashige-Skoog  
806 medium with vitamins (1L of medium contained 0.5 µg nicotinic acid, 0.5 µg pyridoxine, 0.1  
807 µg thiamine, 2 µg glycine) and 0.8% agar. For each genotype analyzed (accessions, mapping  
808 population, T-DNA mutants), plants were cultivated in at least three biological replicates.

809

810

811 **Isolation of isoprenoids**

812 Unless indicated otherwise, entire 3-week-old seedlings were used for the isolation of all  
813 isoprenoid compounds. To elucidate the correlation between polyisoprenoid content vs. *CPT3*  
814 transcript level, the Arabidopsis seedlings, leaves, and flowers were used. For chromatographic  
815 analysis of isoprenoids, either internal (Prens, Dols, and phytosterols) or external  
816 (plastoquinone and tocopherol) standards were employed.

817

818 ***Prens, Dols, and phytosterols***: analyses were performed as described earlier with modifications  
819 (Gawarecka and Swiezewska 2014). Briefly, 3 g of fresh seedlings, supplemented with internal  
820 standards of Pren-14 (15 µg) and cholestenol (10 µg), were homogenized in 20 ml of  
821 chloroform/methanol solution (1/1, v/v) and extracted for 24 h at 25 °C, lipids were subjected  
822 to alkaline hydrolysis, purified on silica gel columns, dissolved in isopropanol (final  
823 concentration 6 mg per 1 ml) and stored at -20 °C until used.

824

825 ***Plastoquinone***: 0.5 g of seedlings was used. Isolation procedure was as described above, but  
826 the hydrolysis step was omitted and the samples were protected from light.

827

828 ***Chlorophylls and carotenoids***: 0.2 g of seedlings was homogenized in acetone, extracted for  
829 24 h at 25 °C, centrifuged (2500 × g) and the supernatant was directly subjected to  
830 spectrophotometric analyses. All isolation steps were performed in darkness.

831

832 ***Tocopherol***: 3 g of seedlings were homogenized in 6 ml ethanol and extracted for 24 h at 25 °C,  
833 the sample was supplemented with 4 ml of water and 3 ml of a mixture of  
834 hexane/dichloromethane (9/1, v/v) to separate the phases. Water phase was re-extracted 3 times  
835 with 3 ml of hexane/dichloromethane, organic phases were pooled and evaporated, lipids were

836 dissolved in 8 ml of dichloromethane and analyzed directly. During the preparation, samples  
837 were protected from light.

838

### 839 **HPLC/UV analyses of polyisoprenoids and plastoquinone**

840 HPLC/UV analyses of polyisoprenoids were performed as described earlier (Gawarecka and  
841 Swiezewska, 2014) with modifications. Briefly, a Waters dual  $\lambda$  absorbance detector and a 4.6  
842  $\times$  75 mm ZORBAX XBD-C18 (3.5  $\mu$ m) column (Agilent, USA) were used. The applied solvent  
843 system was (A) methanol/water (9/1, v/v), (B) methanol/hexane/propan-2-ol (2/1/1, v/v/v) and  
844 a gradient program was from 100 – 35% A for 3 min, 35 – 0% A for 7 min, 100% B for 8 min.  
845 Qualitative analyses were performed using external standards – mixtures of Prens (Pren-9, -11,  
846 ..., -23, -25) and Dols (Dol-16 to -21) – while quantitative analyses were performed using the  
847 internal standard, Prenol-14. All standards were from the Collection of Polyprenols, IBB PAS,  
848 Warsaw, Poland.

849

850 HPLC/UV analyses of plastoquinone were performed using the above protocol with a slightly  
851 modified gradient: 100 – 35% A for 3 min, 35 – 0% A for 7 min, 100% B for 5 min.

852

### 853 **GC/FID analysis of phytosterols and tocopherols**

854 GC analysis was performed employing an Agilent Technologies, 7890A apparatus equipped  
855 with a split/splitless injector and an FID detector with an HP-5 column (J & W Scientific  
856 Columns, Agilent Technologies) 30 m  $\times$  0.32 mm and 0.25  $\mu$ m film thickness.

857

858 Phytosterols were analyzed as described previously (Jozwiak et al., 2013). Signals were  
859 identified by comparison with external standards (Sigma-Aldrich-Fluka, Poznan). The  
860 following compounds were identified in plant samples: campesterol, stigmasterol,  $\beta$ -sitosterol,

861 stigmast-4,22-dien-3one, stigmast-4en-3-one, brassicasterol,  $\beta$ -sitostanol, cholesterol. Total  
862 content of phytosterols was used for further analyses.

863

864 Tocopherols were analyzed as described previously (Kadioglu et al., 2009). Signals of  
865 tocopherol  $\alpha$ ,  $\delta$  and  $\gamma$  were identified by comparison with external standards (a kind gift of Prof.  
866 Gustav Dallner, University of Stockholm). Total content of tocopherols was used for further  
867 analyses.

868

### 869 **Spectrophotometric analyses of chlorophylls and carotenoids**

870 Chlorophylls and carotenoids were analyzed as described earlier (Lichtenthaler and Buschman,  
871 2001). All analyses were performed in triplicate (three independent biological replicates). The  
872 amounts of all isoprenoid compounds were expressed as  $\mu\text{g}$  per g of fresh weight.

873

### 874 **Complementation of the yeast *rer2* $\Delta$ mutant**

875 To express *CPT3* and *LEW1* in *Saccharomyces cerevisiae* mutant cells (*rer2* $\Delta$  mutant:  
876 *rer2::kanMX4 ade2-101 ura3-52 his3-200 lys2-801*), coding sequences of *CPT3* and *LEW1*  
877 (AT1G11755) were subcloned into the pESC-URA yeast dual expression vector (Agilent, Santa  
878 Clara, CA, USA) according to the manufacturer's protocol. Transformant selection and growth,  
879 as well as analyses of polyisoprenoid profile and CPY glycosylation status, were performed as  
880 described previously (Surowiecki et al., 2019).

881

### 882 **Subcellular localization and BiFC assays**

883 For subcellular localization analysis of *35S::CPT3*, *A. tumefaciens* cells carrying the vectors  
884 *CPT3-GFP* and *cd3-954* (ER-CFP, used as an organelle marker) were introduced into the  
885 abaxial side of *Nicotiana benthamiana* leaves. A BiFC assay was performed based on split

886 EYFP. EYFP was fused to the C-terminus of CPT3 and the N-terminus of Lew1, resulting in  
887 the expression of CPT3:EYFPC and Lew1:EYFPN. CPT3:EYFPC was co-infiltrated with  
888 Lew1:EYFPN into the abaxial side of *N. benthamiana* leaves. A positive fluorescence signal  
889 (EYFP) is indicative of the restoration of EYFP due to the heterodimerization of CPT3 with  
890 Lew1.

891  
892 The transient expression of CPT3, ER-CFP, and CPT3/Lew1-YFP fusion proteins was observed  
893 under a Nikon C1 confocal system built on TE2000E with 408, 488 and 543 nm laser excitations  
894 for CFP (450/35 nm emission filter) and GFP (515/30 nm emission filter), respectively.

895

## 896 **Statistical analyses**

### 897 *Quantitative genetic analyses*

898 Mean values of at least three replicates were calculated for each isoprenoid compound measured,  
899 for each AI-RIL and each natural accession. These values were used in QTL mapping and  
900 GWAS. The broad sense heritability ( $H^2$ ) for isoprenoid accumulation for the AI-RIL  
901 population was estimated according to the formula:  $H^2 = V_G / (V_G + V_E)$ , where  $V_G$  is the among-  
902 genotype variance component and  $V_E$  is the residual (error) variance. For GWAS heritability,  
903 estimates have been extracted from the mixed model accordingly.

904

### 905 *QTL analyses in the AI-RIL population*

906 All obtained phenotypical data were used in QTL mapping that was performed using R software  
907 (R Core Team, 2012, <https://www.R-project.org/>) with R/qtl package (Arends et al., 2010,  
908 Broman et al., 2003; <http://www.rqtl.org/>). Stepwise qtl function was used to detect multiple-  
909 QTL models (Broman, 2008, [http://www.rqtl.org/tutorials/new\\_multiqtl.pdf](http://www.rqtl.org/tutorials/new_multiqtl.pdf)). This function  
910 requires single-QTL genome scan to locate QTLs with the highest LOD scores, then the initial

911 model is tested using arguments for additional QTLs and interactions between QTLs search,  
912 model refinement and backward elimination of each QTL detected back to the null model.  
913 Obtained QTL models were refined with the `refineqtl` function; any possible interactions  
914 between QTLs were verified by the `addint` function.

915

## 916 **GWAS**

917 Genome-wide association mapping was performed on measurements for 115 – 119 different  
918 natural accessions per phenotype. The phenotypic data are available at the AraPheno database  
919 (Seren et al., 2016). The genotypic data were based on whole-genome sequencing data (The  
920 1001 Genomes Consortium, 2016) and covered 4,314,718 SNPs for the 119 accessions. GWAS  
921 was performed with a mixed model correcting for population structure in a two-step procedure,  
922 where first all polymorphisms were analyzed with a fast approximation (`emmaX`, Kang et al.,  
923 2010) and afterwards the top 1000 polymorphisms were reanalyzed with the correct full model.  
924 Only polymorphisms with a minor allele count greater than 5 are reported. The kinship structure  
925 has been calculated under the assumption of the infinitesimal model using all sequence variants  
926 with a minor allele frequency of more than 5% in the whole population. The analysis was  
927 performed in R (R Core Team, 2016). The R scripts used are available at  
928 <https://github.com/arthurkorte/GWAS>. The genotype data used for GWAS are available at the  
929 1001 Genomes Project ([www.1001genomes.org](http://www.1001genomes.org)).

930

## 931 *Correlation analyzes of isoprenoid accumulation - a statistical meta-analysis*

932 All correlation analyses were performed with the aid of R version 3.3.0 (R Core Team, 2016,  
933 <https://www.R-project.org/>) using the `outliers` (Komsta, 2011, R package version 0.14,  
934 <https://CRAN.R-project.org/package=outliers>) and the `gplots` (Warnes et al., 2016, R package



935 version 3.0.1, <https://CRAN.R-project.org/package=gplots>). The significance level  $\alpha$  of 0.001  
936 was assumed in all statistical tests.

937  
938 Although for each accession the level of each metabolite was measured in triplicate, the values  
939 thus obtained were analyzed separately, as indicated by the number of experimental points in  
940 the respective figures (which equals three times the number of accessions). Means were not  
941 calculated, and this approach was employed deliberately to avoid the problem of adjusting and  
942 weighing mean values and to allow testing for outliers among single replicates instead of among  
943 mean values.

944  
945 The Shapiro-Wilk test (Shapiro and Wilk 1965) was used to assess the agreement of isoprenoid  
946 content in the populations with the Gaussian distribution. Since, even after filtering out of  
947 extreme values with the Grubbs' test for outliers (Grubbs 1950), a vast majority of the  
948 distributions were found non-Gaussian, further analyses were performed using non-parametric  
949 methods. Consequently, a correlation matrix for the seven investigated isoprenoids was  
950 calculated accordingly to the Spearman's rank correlation coefficients (Spearman 1904).

951 A hierarchical cluster analysis of the correlation matrix was performed according to the Ward  
952 criterion (Ward 1963).

953

#### 954 **Selection of candidate genes from chosen QTL intervals**

955 We selected one QTL for Dol (DOL1) and three QTLs associated with Pren accumulation  
956 (PRE1, PRE2, PRE3) for further *in silico* analyses. The selected intervals were characterized  
957 by the highest percentage of phenotypic variance explained by each QTL and the highest LOD  
958 (logarithm of the odds) score values linked with the lowest number of loci (Table 2). The  
959 positional candidate genes within QTL confidence intervals were extracted from the Araport11

960 Annotation ([www.araport.org](http://www.araport.org)). Firstly, we checked the annotated functions for all genes located  
961 in the selected QTL intervals by analyzing available databases and literature data for the  
962 isoprenoid biosynthetic pathways (TAIR, <http://www.arabidopsis.org>; PubMed,  
963 <https://www.ncbi.nlm.nih.gov/pubmed>). In this way, we obtained lists of candidate genes  
964 putatively considered to be involved in the regulation of Pren and Dol  
965 biosynthesis/accumulation (Supplementary file 1 and 2). Subsequently, we performed *in silico*  
966 analyses focused on tissue distribution and expression levels of the selected genes using data  
967 from the Arabidopsis eFP Browser 2.0 database (<http://bar.utoronto.ca>). This procedure  
968 allowed us to generate four sets of genes – three for Pren (Supplementary file 1) and one for  
969 Dol (Supplementary file 2). Detailed SNP analyses of At2G17570 (*CPT3*), AT1G52450  
970 (*UCHs*), and AT1G52460 (*ABH*) sequences (Supplementary file 6) in the Arabidopsis  
971 population were extracted from the Arabidopsis 1001 genomes data using a custom R script.

972

### 973 **Quantitative real-time PCR analysis**

974 Total RNA from Col-0, Stw-0, and Or-0 seedlings (1-, 2-, and 3-week-old) and leaves (4-, 5-,  
975 and 6-week-old plants) was isolated and purified using RNeasy Plant Mini Kit (Qiagen)  
976 following the manufacturer's instructions. RNA concentration and purity were verified using a  
977 NanoDrop<sup>TM</sup> 1000 Spectrophotometer (Thermo Scientific, Waltham, MA). RNA was treated  
978 with RNase-free DNase I (Thermo Scientific) according to the manufacturer's instructions. 160  
979 ng RNA per each sample was used for first-strand synthesis using SuperScript<sup>TM</sup> II First-Strand  
980 Synthesis System for RT-PCR (Thermo Scientific) and oligo-dT primers according to the  
981 manufacturer's procedure. 2 µl of cDNA was used for real-time PCR analysis of *AtCPT3*  
982 expression, using 0.6 µl each of gene-specific primers (5'-GCGCTTATGTTCGATGCTG-3'-F;  
983 5'-CAGACTCAACCTCCTCAGG-3'-R) in a total volume of 20 µl of Luminaris HiGreen High

984 ROX qPCR Master Mix (Thermo Scientific) in a real-time thermal cycler STEPOnePlus (A&B  
985 Applied Biosystems, Waltham, MA) as instructed.

986

## 987 **ACKNOWLEDGEMENTS**

988 We would like to express our gratitude to Professor Maarten Koornneef for providing the AI-  
989 RILs seeds used in this study. We also would like to thank Dr Agata Lipko for initial  
990 characterization of mutant lines and Rafał Banasiuk for help with preparing high-quality figures.  
991 Dr Marta Hoffman-Sommer is kindly acknowledged for help with preparation of the manuscript.  
992 This research was supported by grants from the National Science Centre of Poland [UMO-  
993 2014/15/N/NZ3/04316] (KG), [UMO-2018/29/B/NZ3/01033] (ES), and [UMO-  
994 2014/15/B/NZ2/01073] (AI), and the National Research Foundation (NRF) of Korea [NRF-  
995 2017R1A2B3009624] (JHA).

996 **REFERENCES**

997 **1,135 genomes reveal the global pattern of polymorphism in *Arabidopsis thaliana*.**

998 1001 Genomes Consortium. (2016)

999 *Cell* **166**:481–491.

1000 **Polyprenols are synthesized by a plastidial *cis*-prenyltransferase and impact**  
1001 **photosynthetic performance in *Arabidopsis thaliana*.**

1002 TA Akhtar, P Surowiecki, H Siekierska, M Kania, K Van Gelder, K Rea, L Virta, M Vatta, K  
1003 Gawarecka, J Wojcik, W Danikiewicz, D Buszewicz, E Swiezewska, L Surmacz (2017)

1004 *Plant Cell* **29**:1709–1725.

1005 **What Has Natural Variation Taught Us about Plant Development, Physiology, and**  
1006 **Adaptation?**

1007 C Alonso-Blanco, MGM Aarts, L Bentsink, JJB Keurentjes, M Reymond, D Vreugdenhil, M  
1008 Koornneef (2009)

1009 *Plant Cell* **21**:1877–1896.

1010 **R/qtl: high-throughput multiple QTL mapping.**

1011 D Arends, P Prins, RC Jansen, KW Broma. (2010)

1012 *Bioinformatics* **26**:2990–2992.

1013 **QTL mapping in new *Arabidopsis thaliana* advanced intercross-recombinant inbred lines.**

1014 S Balasubramanian, C Schwartz, A Singh, N Warthmann, MC Kim, JN Maloof, O Loudet, GT  
1015 Trainer, T Dabi, JO Borevitz, J Chory, D Weigel (2009)

1016 *PLoS One* **4**:e4318 1–8.

1017 **Characterization of the GGPP synthase gene family in *Arabidopsis thaliana*.**

1018 G Beck, D Coman, E Herren, MA Ruiz-Sola, M Rodríguez-Concepción, W Grissem, E  
1019 Vranová (2013)

1020 *Plant Molecular Biology* **82**:393–416.

- 1021 **Terpenoid biomaterials.**
- 1022 J Bohlmann, CI Keeling (2008)
- 1023 *The Plant Journal* **54**:656–669.
- 1024 **Linkage and association mapping of *Arabidopsis thaliana* flowering time in nature.**
- 1025 B Brachi, N Faure, M Horton, E Flahauw, A Vazquez, M Nordborg, J Bergelson, J Cuguen,
- 1026 Roux F (2010)
- 1027 *PLoS Genetics* **6**:e1000940.
- 1028 **R/qtl: QTL mapping in experimental crosses.**
- 1029 KW Broman, H Wu, S Sen, GA Churchill (2003)
- 1030 *Bioinformatics* **19**:889–890.
- 1031 **New functions for exploring multiple-QTL models.**
- 1032 KW Broman (2008)
- 1033 [http://www.rqtl.org/tutorials/new\\_multiqtl.pdf](http://www.rqtl.org/tutorials/new_multiqtl.pdf)
- 1034 **Genetic defects in dolichol metabolism.**
- 1035 A Buczkowska, E Swiezewska, DJ Lefeber (2015)
- 1036 *Journal of Inherited Metabolic Disease* **38**:157–169.
- 1037 **Characterization of dehydrodolichyl diphosphate synthase of *Arabidopsis thaliana*, a key**
- 1038 **enzyme in dolichol biosynthesis.**
- 1039 N Cunillera, M Arrò, O Forès, D Manzano, A Ferrer (2000)
- 1040 *FEBS Letters* **477**:170–174.
- 1041 **Genome-Wide Association Mapping Reveals That Specific and Pleiotropic Regulatory**
- 1042 **Mechanisms Fine-Tune Central Metabolism and Growth in *Arabidopsis***
- 1043 CM Fusari, R Kooke, MA Lauxmann, MG Annunziata, B Enke, M Hoehne, N Krohn, FFM
- 1044 Becker, A Schlereth, R Sulpice, M Stitt, JJB Keurentjes
- 1045 *Plant Cell* **29**:2349–2373.

- 1046 **Analysis of plant polyisoprenoids.**
- 1047 K Gawarecka, E Swiezewska (2014)
- 1048 *Methods in Molecular Biology* **1153**:135 – 147.
- 1049 **cis-Prenyltransferase: new insights into protein glycosylation, rubber synthesis, and**
- 1050 **human diseases.**
- 1051 KA Grabińska, EJ Park, WC Sessa. (2016)
- 1052 *Journal of Biological Chemistry* **291**:18582–18590.
- 1053 **gplots: Various R Programming Tools for Plotting Data.**
- 1054 R Gregory, BB Warnes, L Bonebakker, R Gentleman, A Huber, W Liaw, T Lumley, M
- 1055 Maechler, A Magnusson, S Moeller, M Schwartz, B Venables (2016)
- 1056 <https://cran.r-project.org/web/packages/gplots/gplots.pdf>
- 1057 **Sample criteria for testing outlying observations.**
- 1058 Grubbs FE. (1950)
- 1059 *Annals of Mathematical Statistics* **21**:27–58.
- 1060 **USA United States Patent No 7205456**
- 1061 Hallahan D, Keiper-Hrynko NM (2006)
- 1062 **QTL mapping and GWAS reveal candidate genes controlling capsaicinoid content in**
- 1063 **Capsicum.**
- 1064 K Han, HY Lee, NY Ro, OS Hur, JH Lee, JK Kwon, BC Kang (2018)
- 1065 *Plant Biotechnology Journal* **16**:1546–1558.
- 1066 **Rapid evolution of genomic imprinting in two species of the Brassicaceae.**
- 1067 MR Hatorangan, B Laenen, KA. Steige, T Slotte, C Köhler (2016)
- 1068 *Plant Cell* **28**:1815–1827.
- 1069 **A novel imprinted gene NUWA controls mitochondrial function in barley seed**
- 1070 **development in Arabidopsis.**

- 1071 S He, Y Sun, Q Yang, X Zhang, Q Huang, P Zhao, M Sun, J Liu, W Qian, G Qin, H Gu, LJ Qu.  
1072 (2017)  
1073 *PLoS Genet.* **13**: e1006553.
- 1074 **A raison d’etere for two distinct pathways in the early steps of plant isoprenoids**  
1075 **biosynthesis?**  
1076 A Hemmerlin, JL Harwood, TJ Bach. (2012)  
1077 *Progress in Lipid Research* **51**:95–148.
- 1078 **Genome-wide patterns of genetic variation in worldwide *Arabidopsis thaliana* accessions**  
1079 **from the RegMap panel.**  
1080 MW Horton, AM Hancock, YS Huang, C Toomajian, S Atwell, A Auton, NW Mulyati, A Platt,  
1081 FG Sperone, BJ Vilhjálmsón, M Nordborg, JO Borevitz, J Bergelson (2012)  
1082 *Nature Genetics* **44**:212–216.
- 1083 **Deubiquitylating enzymes and their emerging role in plant biology.**  
1084 E Isono, MK Nagel (2014)  
1085 *Frontiers in Plant Sciences* **5**:56.
- 1086 **Sugar availability modulates polyisoprenoid and phytosterol profiles in *Arabidopsis***  
1087 ***thaliana* hairy root culture.**  
1088 A Jozwiak, M Ples, K Skorupinska-Tudek, K Kania, M Dydak, W Danikiewicz, E Swiezewska  
1089 (2013)  
1090 *Biochimica et Biophysica Acta – Molecular and Cell Biology of Lipids* **1831**:438–447.
- 1091 **Polyprenol reductase2 deficiency is lethal in *Arabidopsis* due to male sterility.**  
1092 A Jozwiak, M Gutkowska, K Gawarecka, L Surmacz, A Buczkowska, M Lichocka, J  
1093 Nowakowska, E Swiezewska (2015)  
1094 *Plant Cell* **27**:3336–3353.

- 1095 **Modelling of dolichol mass spectra isotopic envelopes as a tool to monitor isoprenoid**  
1096 **biosynthesis.**
- 1097 A Jozwiak, A Lipko, M Kania, W Danikiewicz, L Surmacz, A Witek, J Wojcik, K Zdanowski,  
1098 C Pączkowski, T Chojnacki, J Poznanski, E Swiezewska (2017)  
1099 *Plant Physiology* **174**:857–874.
- 1100 **Quantitative determination of underivatized  $\alpha$ -tocopherol in cow milk, vitamin and**  
1101 **multivitamin drugs by GC-FID.**
- 1102 Y Kadioglu, F Demirkaya, AK Demirkaya (2009)  
1103 *Chromatographia* **70**:665–670.
- 1104 **Variance component model to account for sample structure in genome-wide association**  
1105 **studies.**
- 1106 HM Kang, JH Sul, SK Service, NA Zaitlen, S Kong, NB Freimer, C Sabatti, E Eskin (2010)  
1107 *Nature Genetics* **42**:348–354.
- 1108 **Epigenomic diversity in a global collection of *Arabidopsis thaliana* accessions.**
- 1109 T Kawakatsu, S-SC Huang, F Jupe, E Sasaki, RJ Schmitz, MA Urich, R Castanon, JR Nery, C  
1110 Barragan, Y He, H Chen, M Dubin, C-R Lee, C Wang, F Bemm, C Becker, R O'Neil, RC  
1111 O'Malley, DX Quarless, 1001 Genomes Consortium; NJ Schork, D Weigel, M Nordborg, JR  
1112 Ecker (2016)  
1113 *Cell* **166**:492–505.
- 1114 **Identification and characterization of a *cis*, *trans*-mixed heptaprenyl diphosphate**  
1115 **synthase from *Arabidopsis thaliana*.**
- 1116 K Kera, S Takahashi, T Sutoh, T Koyama, T Nakayama (2012)  
1117 *FEBS Journal* **279**:3813–3827.
- 1118 **The genetics of plant metabolism.**



- 1119 JJB Keurentjes, J Fu, CH de Vos, A Lommen, RD Hall, RJ Bino, LH van der Plas, RC Jansen,  
1120 D Vreugdenhil, M Koornneef (2006)  
1121 *Nature Genetics* **38**:842–849.
- 1122 **Comparative quantitative trait loci mapping of aliphatic, indolic and benzylic**  
1123 **glucosinolate production in *Arabidopsis thaliana* leaves and seeds.**
- 1124 DJ Kliebenstein, J Gershenzon, T Mitchell-Olds (2001)  
1125 *Genetics* **159**:359–370.
- 1126 **Package ‘outliers’, Tests for outliers, R package version 0.14.**
- 1127 L Komsta (2011)  
1128 <https://cran.r-project.org/web/packages/outliers/outliers.pdf>
- 1129 **Genome-Wide Association Mapping and Genomic Prediction Elucidate the Genetic**  
1130 **Architecture of Morphological Traits in *Arabidopsis*.**
- 1131 R Kooke, W Kruijer, R Bours, F Becker, A Kuhn, H van de Geest, J Buntjer, T Doeswijk, J  
1132 Guerra, H Bouwmeester, D Vreugdenhil, JJB. Keurentjes (2016)  
1133 *Plant Physiology* **170**:2187–2203.
- 1134 **Naturally occurring genetic variation in *Arabidopsis thaliana*.**
- 1135 M Koornneef, C Alonso-Blanco, D Vreugdenhil (2004)  
1136 *Annual Review of Plant Biology* **55**:141–172.
- 1137 **A mixed-model approach for genome-wide association studies of correlated traits in**  
1138 **structured populations.**
- 1139 A Korte, BJ Vilhjálmsson, V Segura, A Platt, Q Long, M Nordborg (2012)  
1140 *Nature Genetics* **44**:1066–1071.
- 1141 **The advantages and limitations of trait analysis with GWAS: a review.**
- 1142 A Korte, A Farlow (2013)  
1143 *Plant Methods* **9**:29.

- 1144 **Planting molecular functions in an ecological context with *Arabidopsis thaliana* The**  
1145 **natural history of model organisms.**
- 1146 Kramer U. (2015)  
1147 *eLIFE* **4**:1–13.
- 1148 **Biochemical and physiological characterization of *Arabidopsis thaliana* AtCoAse: a Nudix**  
1149 **CoA hydrolyzing protein that improves plant development.**
- 1150 T Kupke, JA Caparrós-Martín, KJ Malquichagua Salazar, FA Culiáñez-Macià (2009)  
1151 *Physiologia Plantarum* **135**:365–378.
- 1152 **cis-Prenyltransferase and polymer analysis from a natural rubber perspective.**
- 1153 M Kwon, EJ Kwon, DK Ro (2016)  
1154 *Methods in Enzymology* **576**:121–145.
- 1155 **Chlorophylls and Carotenoids: measurement and characterization by UVVIS**  
1156 **spectroscopy.**
- 1157 HK Lichtenthaler, C Buschmann (2001)  
1158 *Current Protocols in Food Analytical Chemistry* F4.3.1–F4.3.8.
- 1159 **TURAN and EVAN mediate pollen tube reception in *Arabidopsis* synergids through**  
1160 **protein glycosylation.**
- 1161 H Lindner, SA Kessler, LM Müller, H Shimosato-Asano, A Boisson-Dernier, U Grossniklaus  
1162 (2015)  
1163 *PLoS Biology* **13**: e1002139.
- 1164 **Isoprenoid generating systems in plants - A handy toolbox how to assess contribution of**  
1165 **the mevalonate and methylerythritol phosphate pathways to the biosynthetic process.**
- 1166 A Lipko, E Swiezewska (2016)  
1167 *Progress in Lipid Research* **63**:70–92.

1168 **Identification of metabolic and biomass QTL in *Arabidopsis thaliana* in a parallel analysis**  
1169 **of RIL and IL populations.**

1170 J Lisec J, RC Meyer M Steinfath, H Redestig, M Becher, H Witucka-Wall, O Fiehn, O Torjek,  
1171 J Selbig, T Altmann, L Willmitzer (2008)  
1172 *Plant Journal* **53**:960–972.

1173 **Exploiting differential gene expression and epistasis to discover candidate genes for**  
1174 **drought-associated QTLs in *Arabidopsis thaliana*.**

1175 JT Lovell, JL Mullen, DB Lowry, K Awole, JH Richards, S Sen, PE Verslues, TE Juenger, JK  
1176 McKay (2015)  
1177 *Plant Cell* **27**:969–983.

1178 **The Genetic Architecture of Quantitative Traits.**

1179 TFC Mackay (2001)  
1180 *Annual Review of Genetics* **35**:303–339.

1181 **The metabolic signature related to high plant growth rate in *Arabidopsis thaliana*.**

1182 RC Meyer, M Steinfath, J Lisec, M Becher, H Witucka-Wall, O Törjék, O Fiehn, A Eckardt, L  
1183 Willmitzer, J Selbig, T Altmann (2007)  
1184 *Proceedings of the National Academy of Sciences USA* **104**:4759–4764.

1185 **Unveiling the functional diversity of the Alpha-Beta hydrolase fold in plants**

1186 JT Mindrebo, CM Nartey, Y Seto, MD Burkart, JP Noel (2016)  
1187 *Current Opinion in Structural Biology* **41**:233–246.

1188 **InterPro in 2019: improving coverage, classification and access to protein sequence**  
1189 **annotations**

1190 AL Mitchell, TK Attwood, PC Babbitt, M Blum, P Bork, A Bridge, SD Brown, H-Y Chang, S  
1191 El-Gebali, MI Fraser, J Gough, DR Haft, H Huang, I Letunic, R Lopez, A Luciani, F Madeira,  
1192 A Marchler-Bauer, H Mi, DA Natale, M Necci, G Nuka, C Orengo, AP Pandurangan, T Paysan-

- 1193 Lafosse, S Pesseat, SC Potter, MA Qureshi, ND Rawlings, N Redaschi, LJ Richardson, C  
1194 Rivoire, GA Salazar, A Sangrador-Vegas, CJA Sigrist, I Sillitoe, GG Sutton, N Thanki, PD  
1195 Thomas, SCE Tosatto, S-Y Yong, RD Finn (2019)  
1196 *Nucleic Acids Research* **47**(D1):D351–D360.
- 1197 **The molecular basis of quantitative genetic variation in central and secondary metabolism**  
1198 **in *Arabidopsis*.**
- 1199 T Mitchell-Olds, D Pedersen (1998)  
1200 *Genetics* **149**:739–747.
- 1201 **Isoprenoid biosynthesis in plants: carbon partitioning within the cytoplasmic pathway.**
- 1202 JD Newman, J Chappell (1999)  
1203 *Critical Reviews in Biochemistry and Molecular Biology* **34**:95–106.
- 1204 **Molecular cloning, expression, and functional analysis of a *cis*-prenyltransferase from**  
1205 ***Arabidopsis thaliana*.**
- 1206 SK Oh, KH Han, SB Ryu, H Kang (2000)  
1207 *Journal of Biological Chemistry* **275**:18482–18488.
- 1208 **Chromatography of long chain alcohols (polyprenols) from animal and plant sources.**
- 1209 T Rezanka, J Votruba (2001)  
1210 *Journal of Chromatography A* **936**:95–110.
- 1211 **Biochemical networks and epistasis shape the *Arabidopsis thaliana* metabolome.**
- 1212 HC Rowe, BG Hansen, BA Halkier, DJ Kliebenstein DJ (2008)  
1213 *Plant Cell* **20**:1199–1216.
- 1214 **An efficient multi-locus mixed model approach for genome-wide association studies in**  
1215 **structured populations.**
- 1216 V Segura, BJ Vilhjálmsson, A Platt, A Korte, Ü Seren, Q Long, M Nordborg (2012)  
1217 *Nature Genetics* **44**:825–830.

- 1218 **AraPheno: a public database for *Arabidopsis thaliana* phenotypes.**
- 1219 U Seren, D Grimm, J Fitz, D Weigel, M Nordborg, K Borgwardt, A Korte (2016)
- 1220 *Nucleic Acids Research* **45**:D1054–D1059.
- 1221 **Histochemical analysis reveals organ-specific quantitative trait loci for enzyme activities**
- 1222 **in *Arabidopsis*.**
- 1223 LI Sergeeva, J Vonk, JJB Keurentjes, LH van der Plas, M Koornneef, D Vreugdenhil (2004)
- 1224 *Plant Physiology* **134**:237–245.
- 1225 **An analysis of variance test for normality (complete samples).**
- 1226 SS Shapiro, MB Wilk (1965)
- 1227 *Biometrika* **52**:591–611.
- 1228 **The *Arabidopsis* transcription factor MYB77 modulates auxin signal transduction.**
- 1229 R Shin, AY Burch, KA Huppert, SB Tiwari, AS Murphy, TJ Guilfoyle, DP Schachtman (2007)
- 1230 *Plant Cell* **19**:2440–2453.
- 1231 **Identification of QTLs affecting scopolin and scopoletin biosynthesis in *Arabidopsis***
- 1232 ***thaliana*.**
- 1233 J Siwinska, L Kadzinski, R Banasiuk, A Gwizdek-Wisniewska, A Olry, B Banecki, E
- 1234 Lojkowska, A Ilnatowicz (2014)
- 1235 *BMC Plant Biology* **14**:280–294.
- 1236 **Divergent pattern of polyisoprenoid alcohols in the tissues of *Coluria geoides*: A new**
- 1237 **electrospray ionization MS approach.**
- 1238 K Skorupinska-Tudek, T Bienkowski, O Olszowska, M Furmanowa, T Chojnacki, W
- 1239 Danikiewicz, E Swiezewska (2003)
- 1240 *Lipids* **38**:981–990.
- 1241 **Contribution of the mevalonate and methylerythritol phosphate pathways to the**
- 1242 **biosynthesis of dolichols in plants.**

- 1243 K Skorupinska-Tudek, J Poznanski, J Wojcik, T Bienkowski, I Szostkiewicz, M Zelman-  
1244 Femiak, A Bajda, T Chojnacki, O Olszowska, J Grunler, O Meyer, M Rohmer, W Danikiewicz,  
1245 E Swiezewska (2008)  
1246 *Journal of Biological Chemistry* **283**:21024–21035.
- 1247 **The proof and measurement of association between two things.**  
1248 C Spearman (1904)  
1249 *American Journal of Psychology* **15**:72–101.
- 1250 **Polyisoprenoids - Secondary metabolites or physiologically important superlipids?**  
1251 L Surmacz, E Swiezewska (2011)  
1252 *Biochemical and Biophysical Research Communications* **407**:627–632.
- 1253 **cis-Prenyltransferase AtCPT6 produces a family of very short-chain polyisoprenoids in**  
1254 **planta.**  
1255 L Surmacz, D Plochocka, M Kania, W Danikiewicz, E Swiezewska (2014)  
1256 *Biochimica et Biophysica Acta – Molecular and Cell Biology of Lipids* **1841**:240–250.
- 1257 **Long-chain polyisoprenoids are synthesized by AtCPT1 in *Arabidopsis thaliana*.**  
1258 P Surowiecki, A Onysk, K Manko, E Swiezewska, L Surmacz (2019)  
1259 *Molecules* **24**:2789.
- 1260 **Complete blockage of the mevalonate pathway results in male gametophyte lethality.**  
1261 M Suzuki, S Nakagawa, Y Kamide, K Kobayashi, K Ohyama, H Hashinokuchi, R Kiuchi, K  
1262 Saito, T Muranaka, N Nagata (2009)  
1263 *Journal of Experimental Botany* **60**:2055–2064.
- 1264 **Polyisoprenoids: structure, biosynthesis and function.**  
1265 E Swiezewska, W Danikiewicz (2005)  
1266 *Progress in Lipid Research* **44**:235–258.

- 1267 **Two sesquiterpene synthases are responsible for the complex mixture of sesquiterpenes**  
1268 **emitted from *Arabidopsis* flowers.**
- 1269 D Tholl, F Chen, J Petri, J Gershenzon, E Pichersky (2005)  
1270 *Plant Journal* **42**:757–771.
- 1271 **Biosynthesis and biological functions of terpenoids in plants.**
- 1272 D Tholl (2015)  
1273 *Advances in Biochemistry Engineering/Biotechnology* **148**:63–106.
- 1274 **The AraGWAS Catalog: a curated and standardized *Arabidopsis thaliana* GWAS catalog.**
- 1275 M Togninalli, Ü Seren, D Meng, J Fitz, M Nordborg, D Weigel, K Borgwardt, A Korte, DG  
1276 Grimm (2018)  
1277 *Nucleic Acids Research* **46**:D1150–D1156.
- 1278 **Hierarchical grouping to optimize an objective function.**
- 1279 JH Ward (1963)  
1280 *Journal of the American Statistical Association* **58**:236–244.
- 1281 ***Arabidopsis*: a laboratory manual.**
- 1282 D Weigel, J Glazebrook  
1283 Cold Spring Harbor: New York, NY, USA, 2002; pp. 119–141.
- 1284 **The 1001 genomes project for *Arabidopsis thaliana*.**
- 1285 D Weigel, R Mott (2009)  
1286 *Genome Biology* **10**:107.
- 1287 **Population genomics for understanding adaptation in wild plant species.**
- 1288 D Weigel, M Nordborg (2015)  
1289 *Annual Review of Genetics* **49**:315–38.
- 1290 **High-Resolution Analysis of Parent-of-Origin Allelic Expression in the *Arabidopsis***  
1291 **Endosperm.**

- 1292 P Wolff, I Weinhofer, J Seguin, P Roszak, C Beisel, MTA Donoghue, C Spillane, M Nordborg,  
1293 M Rehmsmeier, C Köhler (2011)  
1294 *PLoS Genet.* **7**: e1002126.  
1295 **Status and prospects of association mapping in plants.**  
1296 C Zhu, M Gore, ES Buckler, J Yu J (2008)  
1297 *The plant genome* **1**: 5–20.  
1298 **An Arabidopsis example of association mapping in structured samples.**  
1299 K Zhao K, MJ Aranzana, S Kim, C Lister, C Shindo, C Tang, C Toomajian, H Zheng, C Dean,  
1300 P Marjoram, M Nordborg (2007)  
1301 *PLOS Genetics* **3**: e4.



1302 **Figure Supplements**

1303

1304 **Figure 2-figure supplement 1.** GC/FID chromatogram of phytosterols from Arabidopsis Col-  
1305 0 seedlings.

1306 **Figure 2-figure supplement 2.** HPLC/UV chromatogram of plastoquinone from Arabidopsis  
1307 Col-0 seedlings.

1308 **Figure 2-figure supplement 3.** GC/FID chromatogram of tocopherols from Arabidopsis Col-  
1309 0 seedlings.

1310 **Figure 3-figure supplement 1.** Content of selected isoprenoids in the seedlings of Arabidopsis  
1311 accessions.

1312 **Figure 4-figure supplement 1.** Frequency distribution of the content of (A) chlorophylls, (B)  
1313 carotenoids, (C) phytosterols, (D) plastoquinone and (E) tocopherols in the seedlings of AI-  
1314 RILs and their parental lines, Col-0 and Est-1.

1315 **Figure 8-figure supplement 1.** Manhattan plot of genome-wide association results for  
1316 polyprenols, chlorophylls and tocopherols.

1317 **Figure 9-figure supplement 1.** Phenotypic appearance of 4-week-old detached leaves of  
1318 AT1G52460-deficient (SALK\_066806, *abh* heterozygous mutant) and wild-type plants (Col-  
1319 0) grown in soil.

1320 **Figure 10-figure supplement 1.** Cumulative distributions (CDF) of the content of seven  
1321 studied metabolites analyzed in the seedlings of Arabidopsis accessions and AI-RILs.

1322

1323

1324

1325

1326

1327 **Supplementary Files**

1328

1329 **Supplementary file 1.** Candidate genes potentially involved in polyprenol accumulation,  
1330 selected from the mapped intervals (a) PRE1, (b) PRE2 and (c) PRE3.

1331 **Supplementary file 2.** Candidate genes potentially involved in dolichol accumulation, selected  
1332 from the mapped QTL interval DOL1.

1333 **Supplementary file 3.** Genetic correlations between metabolite levels.

1334 **Supplementary file 4.** Metabolic data-based correlations between metabolite levels.

1335 **Supplementary file 5.** Summary of candidate genes involved in accumulation of Dol,  
1336 plastoquinone, phytosterols and Pren – comparison of QTL and GWAS approaches.

1337 **Supplementary file 6.** Detailed SNP analysis of the At2G17570 (*CPT3*), AT1G52450 (*UCH*)  
1338 and AT1G52460 (*alpha-beta hydrolase*) sequences in the Arabidopsis population.

1339 **Supplementary file 7.** *Arabidopsis thaliana* accessions used in this study.

1340 **Supplementary file 8.** Sequences of oligonucleotides used for the construction of the *AtCPT3*  
1341 silencing vector.

1342

1343

1344

1345

1346

1347

1348

1349

1350

1351

1352 **Source Data**

1353

1354 Figure 2–**Source Data 1** (xlsx file format)

1355 Figure 2–figure supplement 2–**Source Data 2** (xlsx file format)

1356 Figure 2–figure supplement 3–**Source Data 3** (xlsm file format)

1357 Figure 3, Figure 3–figure supplement 1–**Source Data 4** (xlsx file format)

1358 Figure 4, Figure 4–figure supplement 1, Table 1–**Source Data 5** (xlsx file format)

1359 Figure 5A, Table 2–**Source Data 6** (csv file format)

1360 Figure 5B, Table 2–**Source Data 7** (csv file format)

1361 Figure 5C, Table 2–**Source Data 8** (csv file format)

1362 Figure 5D, Table 2–**Source Data 9** (csv file format)

1363 Figure 6AB–**Source Data 10** (xlsx file format)

1364 Figure 6C–**Source Data 11** (xlsx file format)

1365 Figure 6D\_BLUE–**Source Data 12** (tif file format)

1366 Figure 6D\_GREEN–**Source Data 13** (tif file format)

1367 Figure 6D\_MERGE–**Source Data 14** (tif file format)

1368 Figure 6E\_BLUE–**Source Data 15** (tif file format)

1369 Figure 6E\_GREEN–**Source Data 16** (tif file format)

1370 Figure 6E\_MERGE–**Source Data 17** (tif file format)

1371 Figure 7A–**Source Data 18** (xlsx file format)

1372 Figure 7B–**Source Data 19** (jpg file format)

1373 Figure 8, Figure 8–figure supplement 1–**Source Data 20** (csv file format)

1374 Figure 9B–**Source Data 21** (xlsx file format)

1375 Figure 10 and 11, Figure 10-figure supplement 1–**Source Data 22** (txt file format)

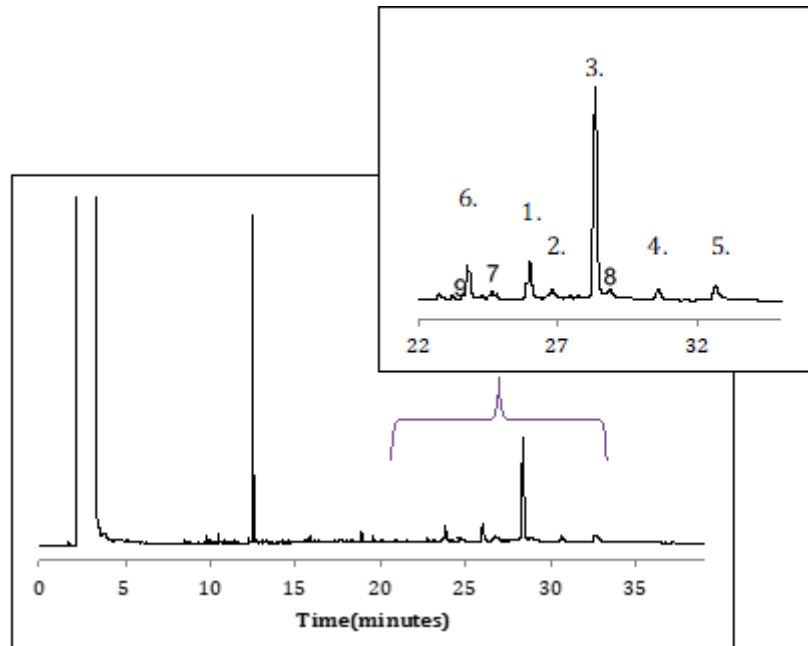

**Figure 2-figure supplement 1**

**GC/FID chromatogram of phytosterols from Arabidopsis Col-0 seedlings.** 1. campesterol; 2. stigmasterol; 3.  $\beta$ -sitosterol; 4. stigmast-4,22-dien-3-one; 5. stigmast-4en-3-one; 6. cholestanol – internal standard; 7. brassicasterol; 8.  $\beta$ -sitostanol 9. cholesterol. The same profile of phytosterols was recorded for all analyzed accessions. Inset presents the magnified region of chromatogram. Indicated signals (1-5 and 7-9) were integrated to calculate the amount of phytosterols.

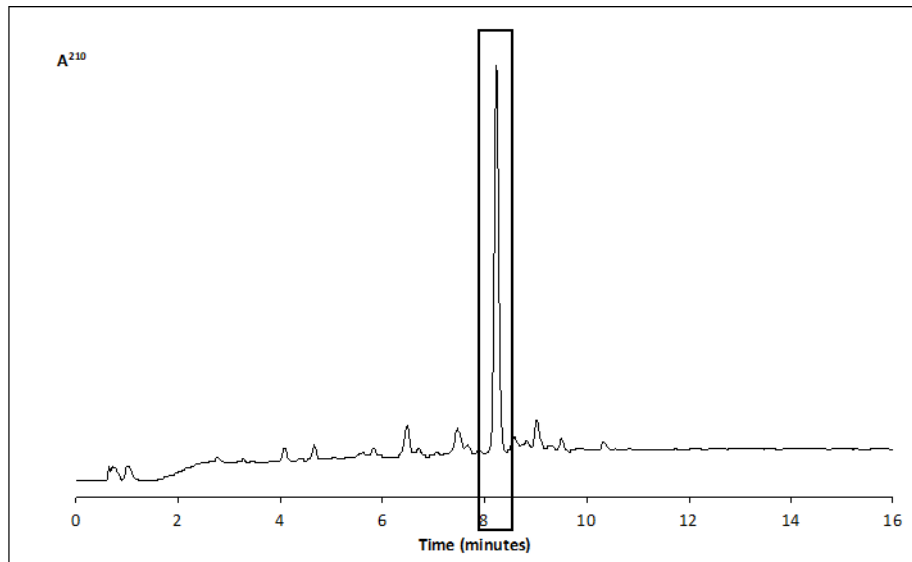

**Figure 2-figure supplement 2**

**HPLC/UV chromatogram of plastoquinone of Arabidopsis Col-0 seedlings.** The same lipid profile of was recorded for all analyzed accessions. Indicated signal was integrated to calculate the amount of PQ (Source Data 2).

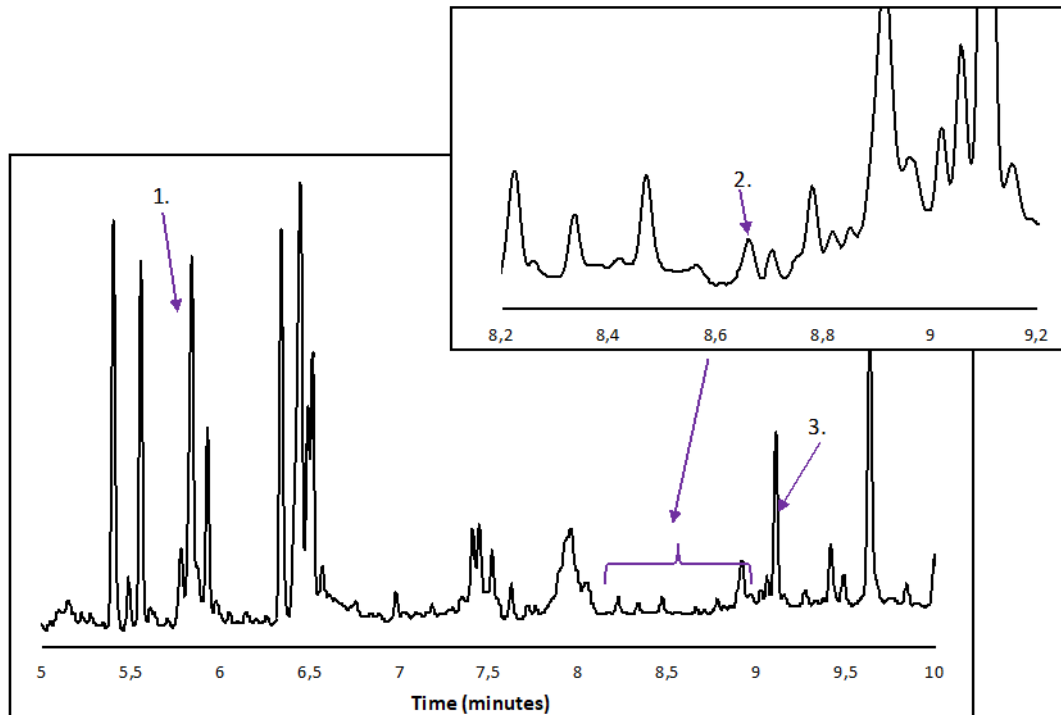

**Figure 2-figure supplement 3**

**GC/FID chromatogram of tocopherols from Arabidopsis Col-0 seedlings.** 1.  $\gamma$  - tocopherol; 2.  $\delta$  - tocopherol (inset); 3.  $\alpha$  - tocopherol of Arabidopsis Col-0 seedlings. The same lipid profile was observed for all analyzed accessions. Indicated signals (1-3) were integrated to calculate the amount of lipids (Source Data 3).

(A)

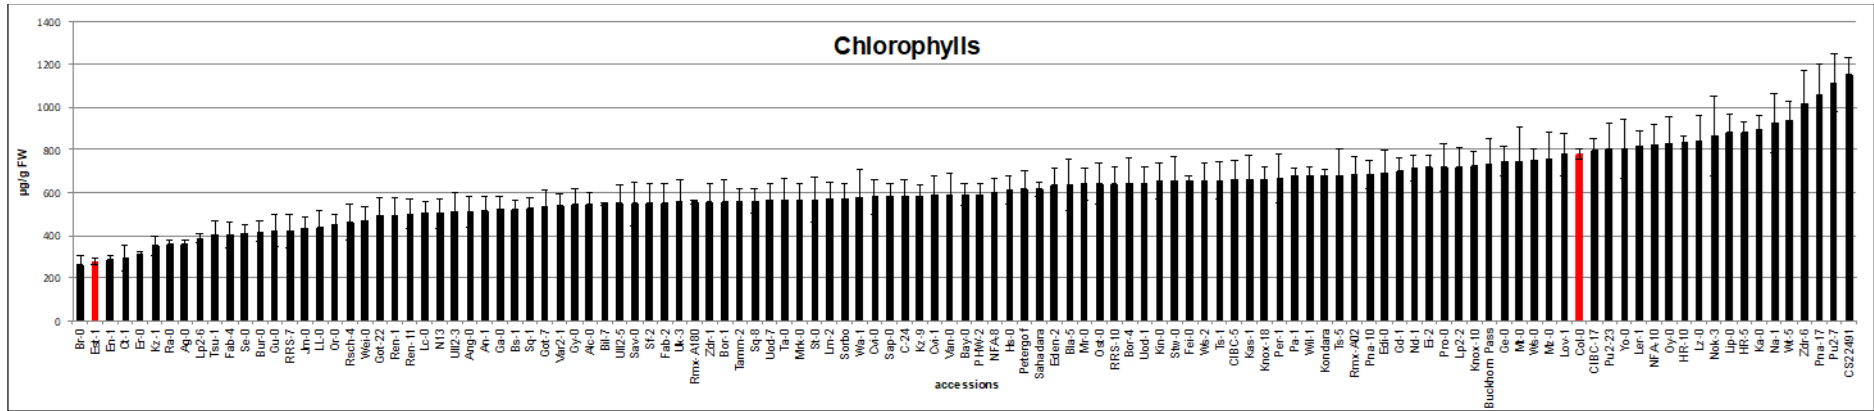

(B)

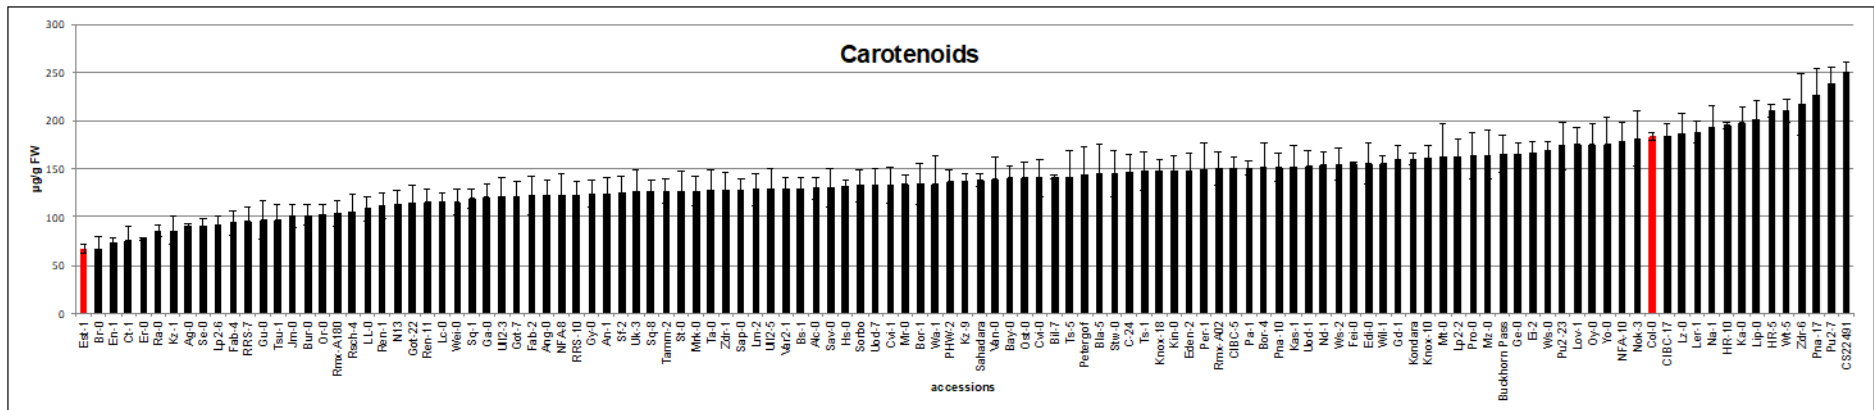

(C)

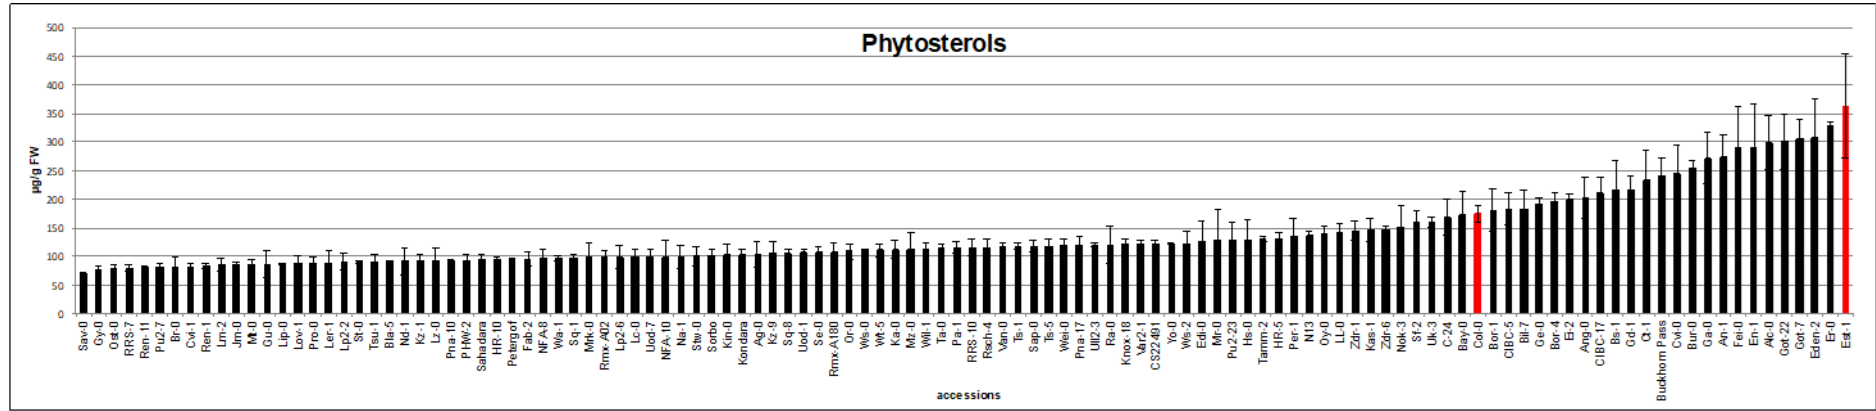

(D)

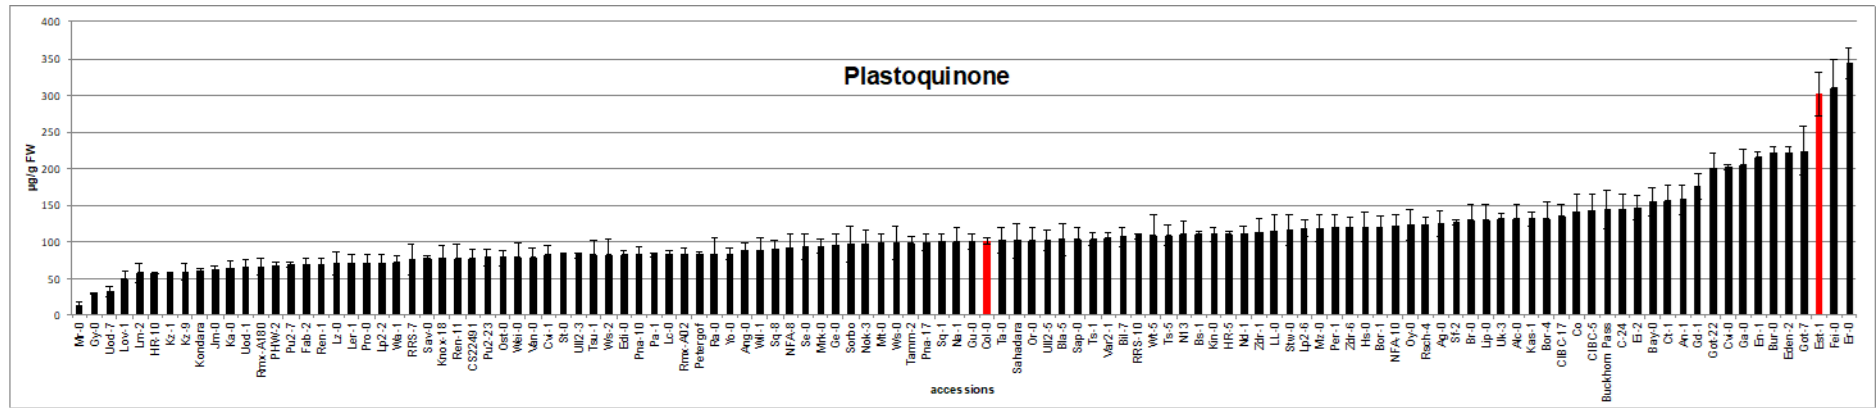



(E)

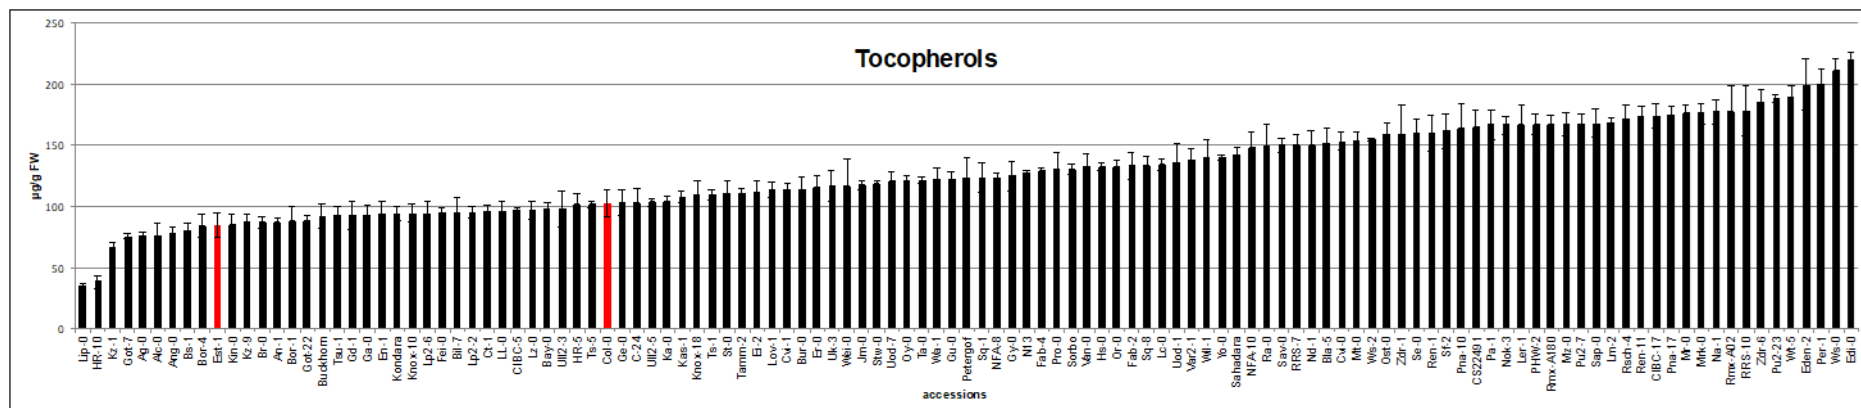

Figure 3-figure supplement 1

Content of selected isoprenoids in the seedlings of Arabidopsis accessions: (A) chlorophylls, (B) carotenoids, (C) phytosterols, (D) plastoquinone and (E) tocopherols.

Bars presenting the content of particular isoprenoids in Col-0 and Est-1 are marked in red. All experiments were performed in triplicate, shown is mean  $\pm$  SD. See Source Data 4.

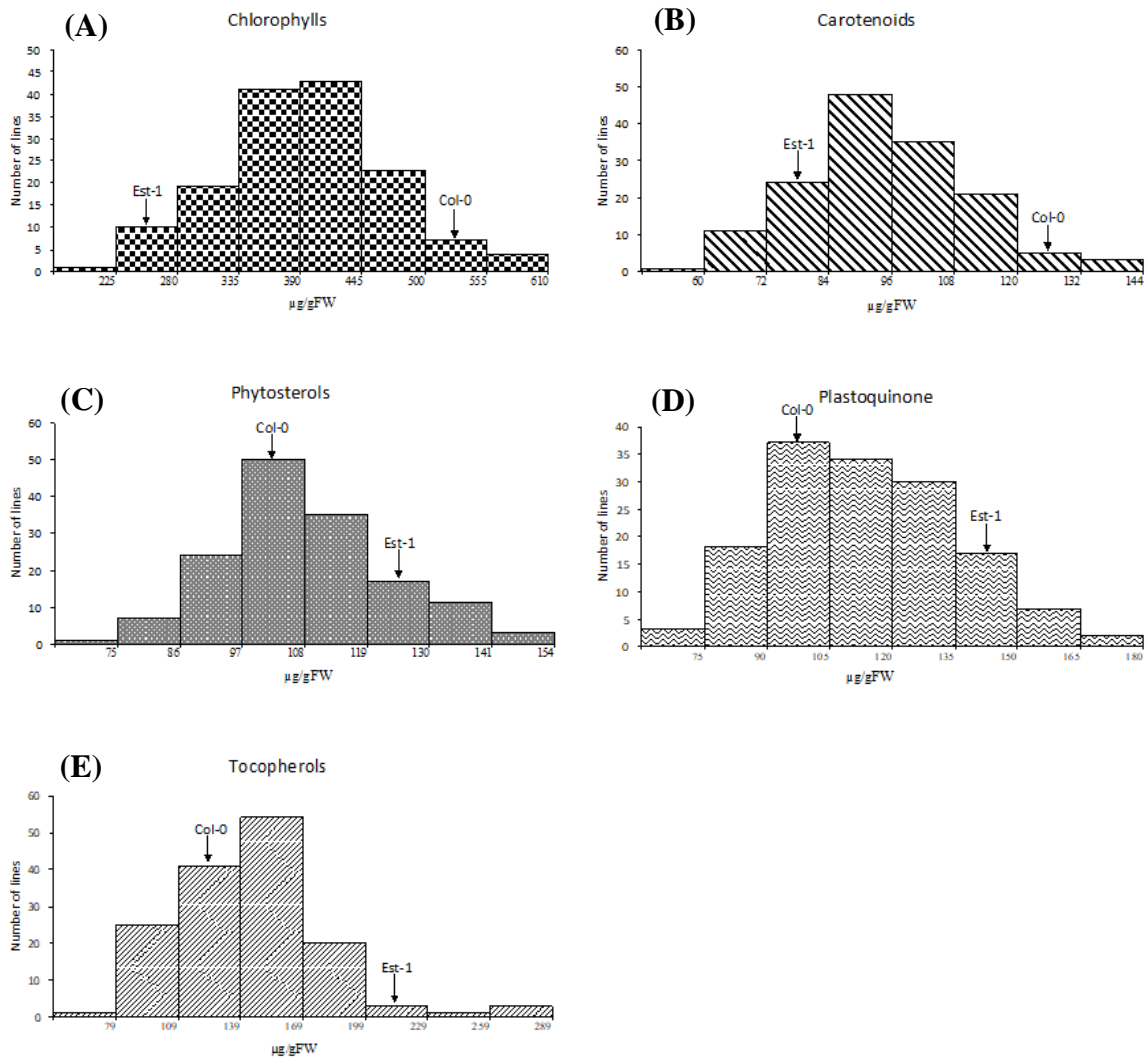

**Figure 4-figure supplement 1**

**Frequency distribution of the content of (A) chlorophylls, (B) carotenoids, (C) phytosterols, (D) plastoquinone and (E) tocopherols in the seedlings of AI-RILs and their parental lines, Col-0 and Est-1.**

Each bar covers the indicated range of the content of a particular isoprenoid compound. See Source Data 5.

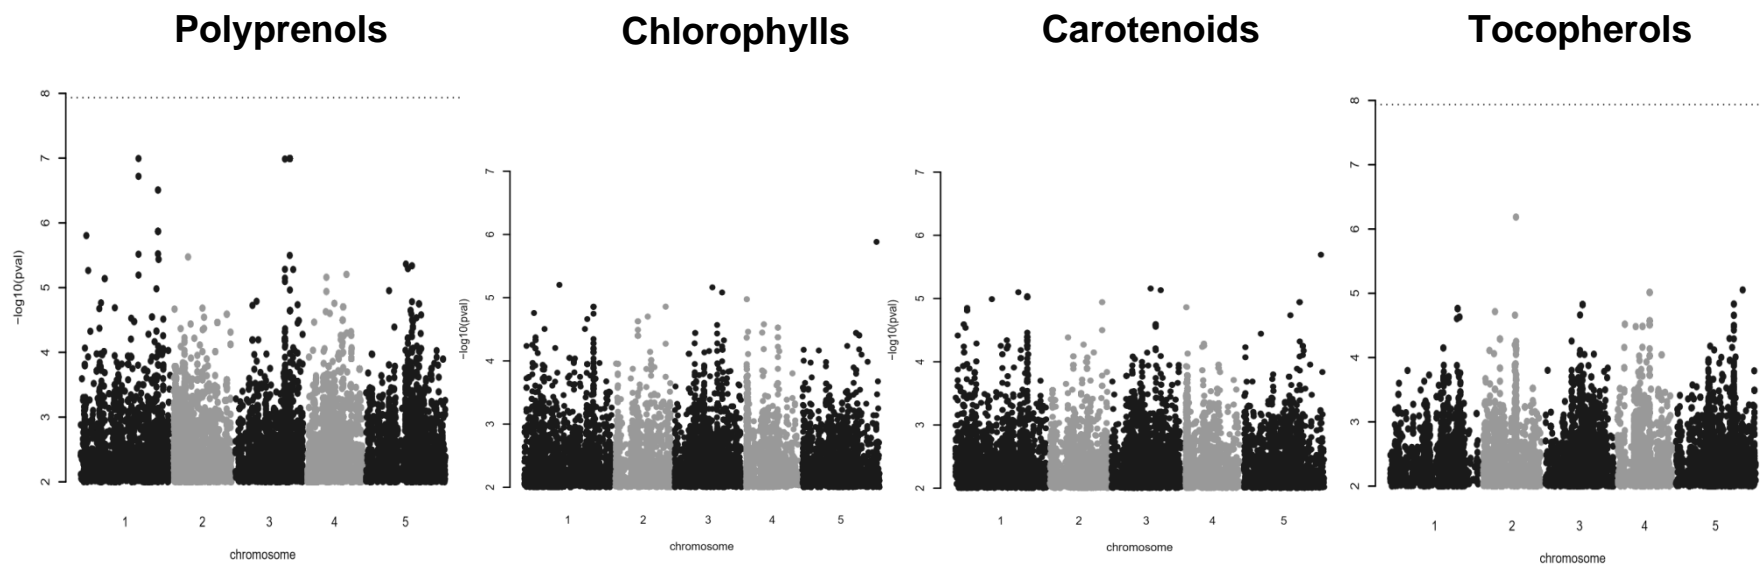

**Figure 8-figure supplement 1**

**Manhattan plot of genome-wide association results for polyprenols, chlorophylls and tocopherols.**

The dotted horizontal lines indicate a significance level of 0.05 after Bonferroni correction for multiple testing. See Material and methods and Source Data 20.

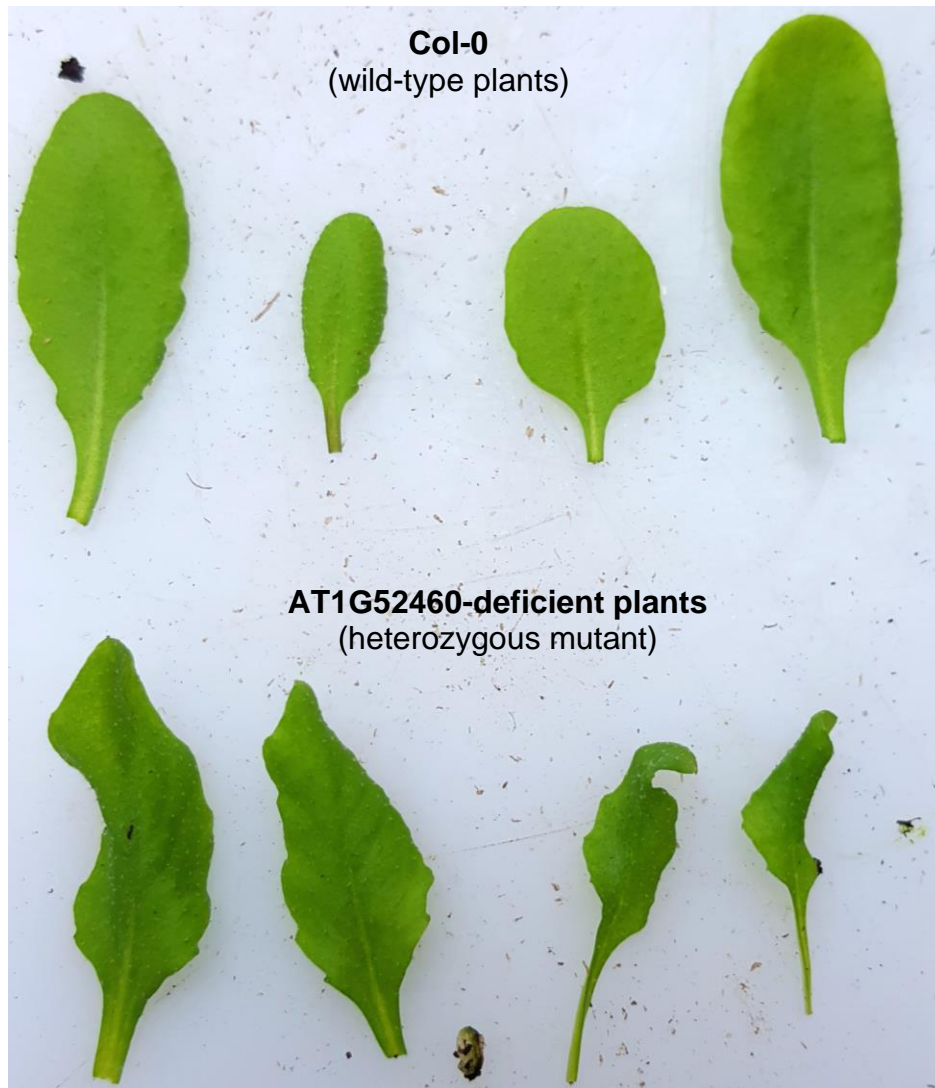

**Figure 9-figure supplement 1**

**The phenotypic appearance of 4-week-old detached leaves of AT1G52460-deficient line (SALK\_066806, *alpha-beta hydrolase*, heterozygous mutant) and wild-type (Col-0) plants grown in soil.**

**(E)**

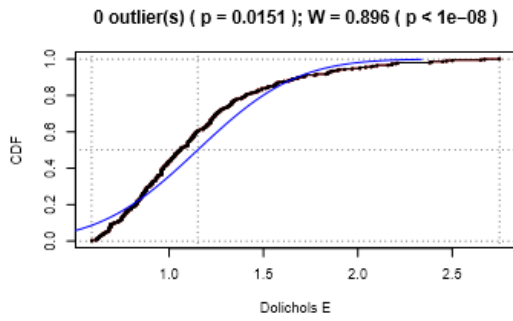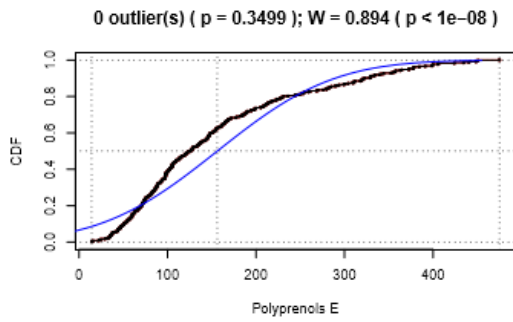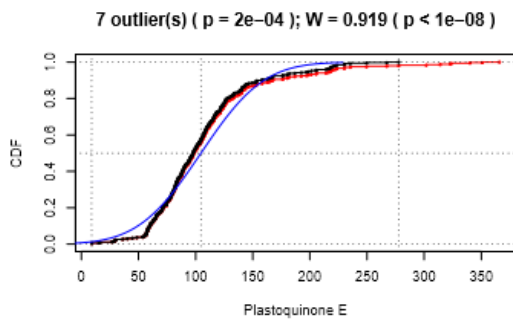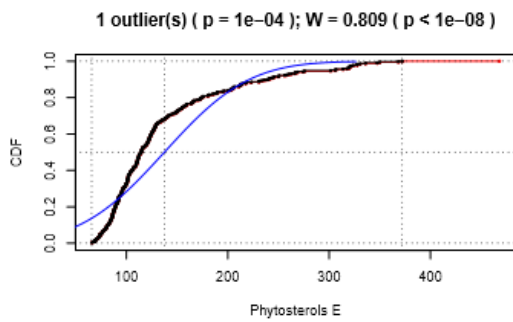

**(M)**

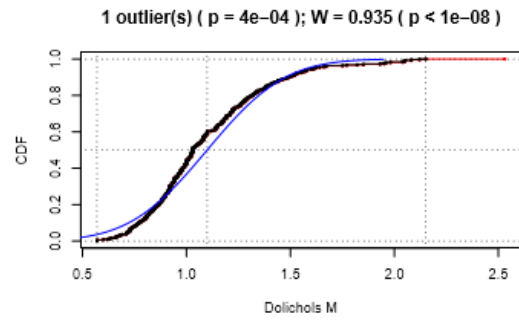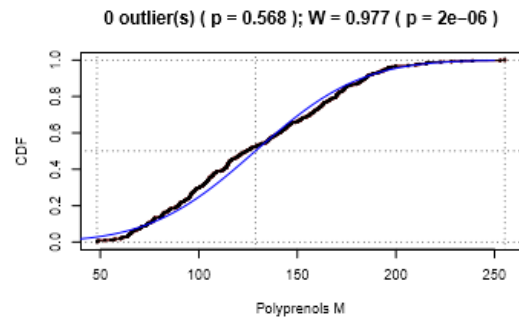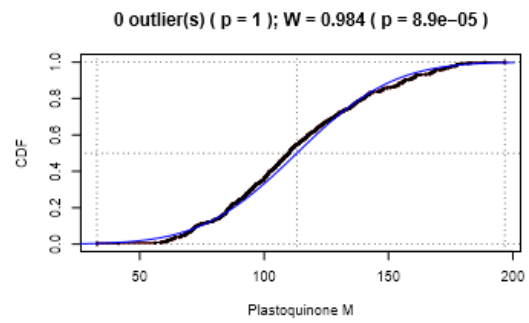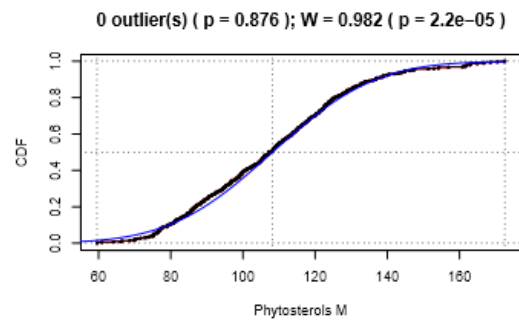

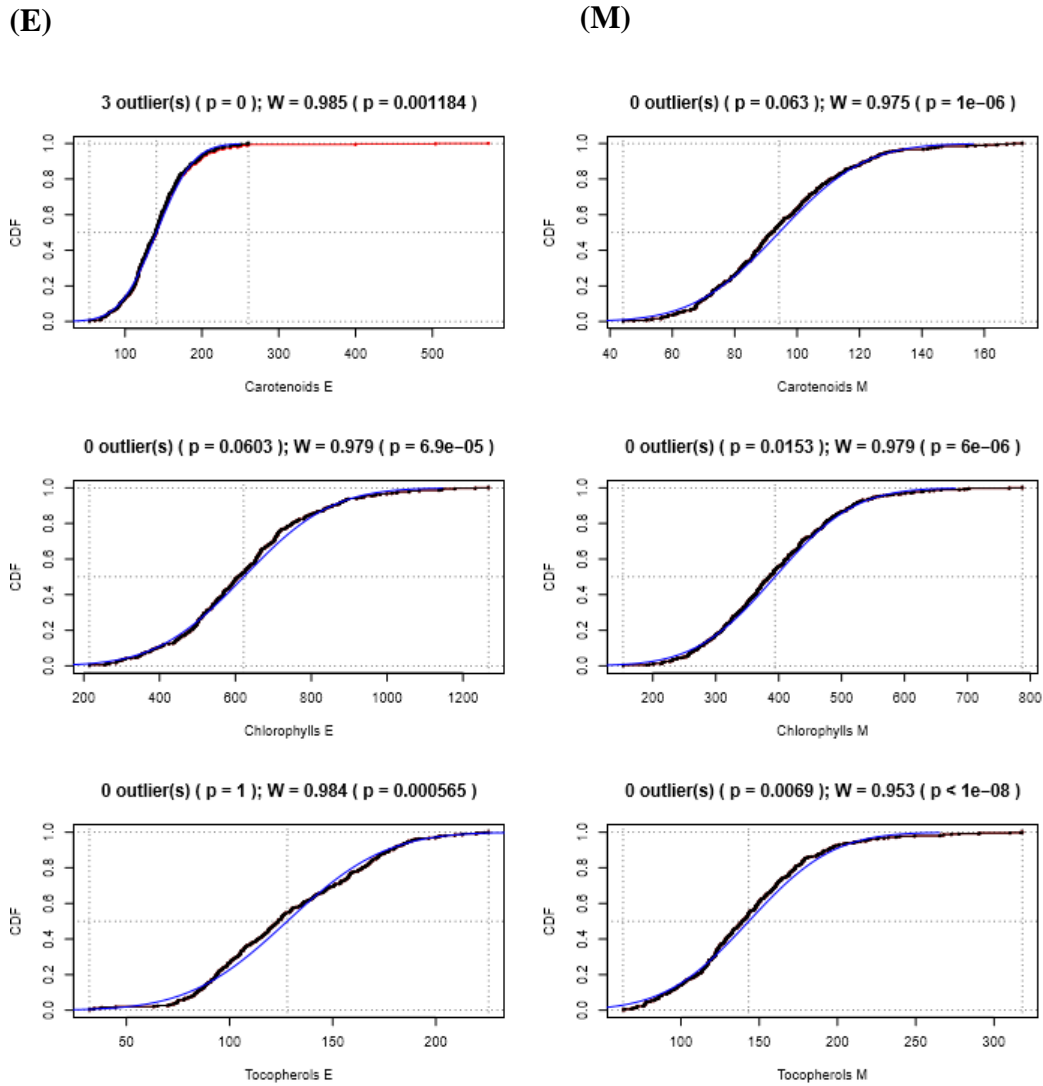

**Figure 10-figure supplement 1**

**Cumulative distributions (CDF) of the content of seven studied metabolites analyzed in the seedlings of Arabidopsis accessions (E) and AI-RILs (M) (left and right column, respectively).** Each set of data, presented in a single panel, was analyzed to check for the presence of outliers (Grubbs test at significance level  $\alpha=0.001$ ), and for normal distribution of the data filtered out of outliers (Shapiro-Wilk test). Red markers follow original distributions, while black ones show the same data with outliers removed. Blue lines represent the CDF expected for the normal distribution. Short statistics for Grubbs (G, p) and Shapiro-Wilk (W, p) tests are shown above each panel. See Material and methods and Source Data 22.
